# Supplementary material for: Secondary metabolite gene clusters in the entomopathogen fungus Metarhizium anisopliae: genome identification and patterns of expression in a cuticle infection model
Source: PubMed Central journal article supplement (PMC5088523; doi:10.1186/s12864-016-3067-6), 2016-10-25
Supplement: 12864_2016_3067_MOESM1_ESM.pdf [file 12864_2016_3067_MOESM1_ESM.pdf]

**Additional File 1: Fungal genomes used in this work.**

| <b>Genome</b>                                      | <b>NCBI's Accession Number</b> |
|----------------------------------------------------|--------------------------------|
| <b>Genomes from <i>Metarhizium</i> species</b>     |                                |
| <i>Metarhizium anisopliae</i> E6                   | PRJNA245858                    |
| <i>Metarhizium robertsii</i> ARSEF23               | PRJNA38717                     |
| <i>Metarhizium acridum</i> CQMa102                 | PRJNA38715                     |
| <i>Metarhizium majus</i> ARSEF297                  | PRJNA184757                    |
| <i>Metarhizium guizhouense</i> ARSEF977            | PRJNA184755                    |
| <i>Metarhizium brunneum</i> ARSEF3297              | PRJNA184756                    |
| <i>Metarhizium album</i> ARSEF1941                 | PRJNA72731                     |
| <b>Unannotated genomes</b>                         |                                |
| <i>Epichloë festucae</i> F11                       | PRJNA51625                     |
| <i>Epichloë baconii</i> ATCC 200745                | PRJNA221976                    |
| <i>Balansia obtecta</i> B249                       | PRJNA221345                    |
| <i>Epichloë sylvatica</i> GR10156                  | PRJNA275112                    |
| <i>Neotyphodium gansuense</i> E7080                | PRJNA67299                     |
| <i>Pochonia chlamydosporia</i> 123                 | PRJNA68669                     |
| <i>Periglandula ipomoeae</i> IasaF13               | PRJNA67303                     |
| <i>Aciculosporium take</i> MAFF-241224             | PRJNA67241                     |
| <i>Hypocrella siamensis</i> MTCC 10142             | PRJNA242986                    |
| <i>Atkinsonella hypoxylon</i> B4728                | PRJNA221544                    |
| <i>Claviceps fusiformis</i> PRL 1980               | PRJNA67243                     |
| <b>Genomes used for OrthoMCL clustering</b>        |                                |
| <i>Metarhizium anisopliae</i> E6                   | PRJNA245858                    |
| <i>Metarhizium robertsii</i> ARSEF23               | PRJNA38717                     |
| <i>Metarhizium acridum</i> CQMa102                 | PRJNA38715                     |
| <i>Metarhizium majus</i> ARSEF297                  | PRJNA184757                    |
| <i>Metarhizium guizhouense</i> ARSEF977            | PRJNA184755                    |
| <i>Metarhizium brunneum</i> ARSEF3297              | PRJNA184756                    |
| <i>Metarhizium album</i> ARSEF1941                 | PRJNA72731                     |
| <i>Metarhizium anisopliae</i> E6                   | PRJNA245858                    |
| <i>Acremonium chrysogenum</i> ATCC 11550           | PRJNA248608                    |
| <i>Aspergillus fumigatus</i> Af293                 | PRJNA131                       |
| <i>Aspergillus nomius</i> NRRL 13137               | PRJNA246595                    |
| <i>Coccidioides posadasii</i> str. <i>Silveira</i> | PRJNA17787                     |
| <i>Leptosphaeria maculans</i> JN3                  | PRJNA171003                    |
| <i>Penicillium digitatum</i> PHI26                 | PRJNA157541                    |
| <i>Scedosporium apiospermum</i> IHEM 14462         | PRJNA244532                    |
| <i>Talaromyces marneffeii</i> PM1                  | PRJNA251717                    |
| <i>Talaromyces stipitatus</i> ATCC 10500           | PRJNA19557                     |

---

|                                                 |             |
|-------------------------------------------------|-------------|
| <i>Thielavia terrestris</i> NRRL 8126           | PRJNA32847  |
| <i>Tolytlocadium ophioglossoides</i> CBS 100239 | PRJNA91059  |
| <i>Trichophyton soudanense</i> CBS 452.61       | PRJNA186831 |
| <i>Arthroderma benhamiae</i> CBS 112371         | PRJNA30573  |
| <i>Aspergillus clavatus</i> NRRL 1              | PRJNA15664  |
| <i>Aspergillus fischeri</i> NRRL 181            | PRJNA15672  |
| <i>Aspergillus niger</i> CBS 513.88             | PRJNA19275  |
| <i>Arthroderma otae</i> CBS 113480              | PRJNA30939  |
| <i>Aspergillus udagawae</i>                     | PRJDB3949   |
| <i>Coccidioides immitis</i> RS                  | PRJNA12883  |
| <i>Coccidioides posadasii</i> RMSCC 3488        | PRJNA17783  |
| <i>Colletotrichum sublineola</i>                | PRJNA262370 |
| <i>Microsporum gypseum</i> CBS 118893           | PRJNA20599  |
| <i>Madurella mycetomatis</i>                    | PRJNA267680 |
| <i>Neofusicoccum parvum</i> UCRNP2              | PRJNA187491 |
| <i>Oidiodendron maius</i> Zn                    | PRJNA74727  |
| <i>Pseudogymnoascus sp.</i> VKM F-3557          | PRJNA216963 |
| <i>Pyrenophora teres f. teres</i> 0-1           | PRJNA50389  |
| <i>Talaromyces cellulolyticus</i>               | PRJDB3250   |
| <i>Torrubiella hemipterigena</i>                | PRJEB7402   |
| <i>Trichophyton interdigitale</i> H6            | PRJNA186827 |
| <i>Talaromyces islandicus</i>                   | PRJEB8788   |
| <i>Trichophyton rubrum</i> CBS 118892           | PRJNA38221  |
| <i>Trichophyton verrucosum</i> HKI 0517         | PRJNA39693  |

---
