# Supplementary material for: Secondary metabolite gene clusters in the entomopathogen fungus Metarhizium anisopliae: genome identification and patterns of expression in a cuticle infection model
Source: PubMed Central journal article supplement (PMC5088523; doi:10.1186/s12864-016-3067-6), 2016-10-25
Supplement: 12864_2016_3067_MOESM2_ESM.pdf [file 12864_2016_3067_MOESM2_ESM.pdf]

**Additional File 2: OrthoMCL clustering results.**

|                                                                                       |                                                                                            |                   |                   |                |
|---------------------------------------------------------------------------------------|--------------------------------------------------------------------------------------------|-------------------|-------------------|----------------|
| <p style="text-align: center;"><b>MaPKS1<br/>(MANI_014762)<br/>Backbone gene*</b></p> | AcI EAW12049.1                                                                             | AcI EAW12177.1    | Afi EAW17018.1    |                |
|                                                                                       | Afi EAW19983.1                                                                             | Afu EAL84933.1    | Afu EAL86540.1    |                |
|                                                                                       | Ani XP001390084.2                                                                          | Ani XP001393501.2 |                   |                |
|                                                                                       | Ani XP001395291.2                                                                          | Ano KNG83914.1    | Ano KNG86665.1    |                |
|                                                                                       | Ano KNG91356.1                                                                             | Aot XP002843683.1 | Aot XP002846669.1 |                |
|                                                                                       | Aot XP002848394.1                                                                          | Aud GAO81768.1    | Aud GAO86048.1    |                |
|                                                                                       | Aud GAO89462.1                                                                             | Aud GAO90476.1    | Cim EAS31602.3    |                |
|                                                                                       | Cim EAS32138.2                                                                             | Cim EAS33665.3    | Cim EAS34547.3    |                |
|                                                                                       | Cpo EFW13280.1                                                                             | Cpo EFW17356.1    | Cpo EFW20973.1    |                |
|                                                                                       | Cpo EFW23245.1                                                                             | Cps KMM68116.1    | Cps KMM70187.1    |                |
|                                                                                       | Cps KMM71002.1                                                                             | Cps KMM72476.1    | Csu KDN60752.1    |                |
|                                                                                       | Csu KDN67932.1                                                                             | Csu KDN68948.1    | Csu KDN72002.1    |                |
|                                                                                       | Mac EFY84249.1                                                                             | Mac EFY85737.1    | Mac EFY89365.1    |                |
|                                                                                       | MANI_006324                                                                                | MANI_020781       | Mbr KID60724.1    |                |
|                                                                                       | Mbr KID72947.1                                                                             | Mbr KID74158.1    | Mgu KID81974.1    |                |
|                                                                                       | Mgu KID82773.1                                                                             | Mgu KID83470.1    | Mgu KID84064.1    |                |
|                                                                                       | Mma KID95125.1                                                                             | Mma KID96266.1    | Mma KID99274.1    |                |
|                                                                                       | Mmy KXX79183.1                                                                             | Mmy KXX79217.1    | Mro EFY94576.2    |                |
|                                                                                       | Mro EFY96642.1                                                                             | Mro EFY96950.1    | Oma KIM92947.1    |                |
|                                                                                       | Oma KIM94086.1                                                                             | Oma KIM97742.1    | Oma KIN05207.1    |                |
|                                                                                       | Pdi EKV06857.1                                                                             | Pdi EKV16250.1    | Pte EFQ90032.1    |                |
|                                                                                       | Pte EFQ91438.1                                                                             | Pte EFQ92321.1    | Tce GAM33949.1    |                |
|                                                                                       | Tce GAM33954.1                                                                             | Tce GAM33973.1    | Tce GAM35873.1    |                |
|                                                                                       | Tce GAM41193.1                                                                             | Tce GAM41694.1    | The CEJ81468.1    |                |
|                                                                                       | The CEJ90349.1                                                                             | The CEJ91591.1    | Tis CRG86486.1    |                |
|                                                                                       | Tis CRG88297.1                                                                             | Tis CRG91771.1    | Tis CRG91775.1    |                |
|                                                                                       | Tis CRG92018.1                                                                             | Tma KFX42009.1    | Tma KFX41537.1    |                |
|                                                                                       | Tma KFX45541.1                                                                             | Tma KFX45542.1    | Tma KFX46688.1    |                |
|                                                                                       | Tma KFX46693.1                                                                             | Top KND87339.1    | Top KND88239.1    |                |
|                                                                                       | Top KND93702.1                                                                             | Top KND93710.1    | Top KND93709.1    |                |
|                                                                                       | Tst EED12110.1                                                                             | Tst EED12124.1    | Tst EED18001.1    |                |
|                                                                                       | Tst EED22580.1                                                                             | Tst EED22651.1    | Tst EED22678.1    |                |
|                                                                                       | Tst EED22683.1                                                                             | Tte AEO64805.1    | Tte AEO67399.1    |                |
|                                                                                       | Tte AEO68597.1                                                                             | Tte AEO67410.1    | Abe EFE29950.1    |                |
|                                                                                       | Ach KFH44362.1                                                                             | Ani XP001393524.2 | Lma XP003842913.1 |                |
|                                                                                       | Mal KHN98032.1                                                                             | Mgy EFR04739.1    | Npa EOD53036.1    |                |
|                                                                                       | Psp KFX98702.1                                                                             | Sap KEZ43375.1    | Tin EZF36181.1    |                |
|                                                                                       | Tru EGD89109.2                                                                             | Tso EZF74361.1    | Tve EFE42799.1    |                |
|                                                                                       | Ano KNG83518.1                                                                             | Lma XP003842914.1 | Psp KFX99638.1    |                |
|                                                                                       | <p style="text-align: center;"><b>MaNRPS-PKS2<br/>(MANI_018878)<br/>Backbone gene*</b></p> | Abe EFE30182.1    | Abe EFE31625.1    | Abe EFE33181.1 |
|                                                                                       |                                                                                            | Abe EFE33214.1    | Abe EFE33589.1    | Abe EFE34630.1 |
|                                                                                       |                                                                                            | Abe EFE36394.1    | Ach KFH40504.1    | Ach KFH40639.1 |
|                                                                                       |                                                                                            | Ach KFH40913.1    | Ach KFH41335.1    | Ach KFH42117.1 |
|                                                                                       |                                                                                            | Ach KFH43187.1    | Ach KFH43887.1    | Ach KFH43961.1 |
|                                                                                       |                                                                                            | Ach KFH44143.1    | Ach KFH44396.1    | Ach KFH44962.1 |

|                   |                   |                   |
|-------------------|-------------------|-------------------|
| Ach KFH45102.1    | Ach KFH45393.1    | Ach KFH45702.1    |
| Ach KFH46614.1    | Ach KFH47519.1    | Ach KFH44074.1    |
| Ach KFH42871.1    | Ach KFH45364.1    | Ach KFH40930.1    |
| Ach KFH44047.1    | Ach KFH44869.1    | Acl EAW07064.1    |
| Acl EAW07624.1    | Acl EAW08895.1    | Acl EAW09019.1    |
| Acl EAW09117.1    | Acl EAW11760.1    | Acl EAW12170.1    |
| Acl EAW12336.1    | Acl EAW12416.1    | Acl EAW13625.1    |
| Acl EAW14856.1    | Acl EAW08950.1    | Acl EAW10019.1    |
| Acl EAW13520.1    | Acl EAW13531.1    | Acl EAW15062.1    |
| Afi EAW16387.1    | Afi EAW16886.1    | Afi EAW17052.1    |
| Afi EAW17483.1    | Afi EAW19759.1    | Afi EAW21094.1    |
| Afi EAW23638.1    | Afi EAW23793.1    | Afi EAW16804.1    |
| Afi EAW20415.1    | Afu EAL85113.2    | Afu EAL86424.2    |
| Afu EAL89230.2    | Afu EAL91103.2    | Afu EAL85129.1    |
| Afu EAL87227.2    | Afu EAL92117.1    | Afu EAL87813.1    |
| Ani XP001388555.2 | Ani XP001389118.2 | Ani XP001390513.2 |
| Ani XP001391193.2 | Ani XP001393447.2 |                   |
| Ani XP001393508.2 | Ani XP001394029.2 |                   |
| Ani XP001394423.2 | Ani XP001394543.2 | Ani XP001395346.2 |
| Ani XP001395352.1 | Ani XP001397040.2 | Ani XP001398521.2 |
| Ani XP001400073.2 | Ani XP001389116.2 | Ani XP001390395.2 |
| Ani XP001394387.1 | Ani XP001394579.1 | Ani XP001396949.2 |
| Ani XP001392496.2 | Ani XP001394581.2 | Ani XP001396381.2 |
| Ani XP001396752.1 | Ani XP001397313.2 | Ani XP001401800.2 |
| Ani XP001402359.2 | Ani XP001393844.2 | Ani XP003188554.1 |
| Ani XP001394625.2 | Ani XP001396431.2 | Ani XP001399961.2 |
| Ani XP001400817.2 | Ani XP003188850.1 | Ani XP001395761.2 |
| Ano KNG81069.1    | Ano KNG81092.1    | Ano KNG81162.1    |
| Ano KNG82131.1    | Ano KNG83279.1    | Ano KNG83443.1    |
| Ano KNG83684.1    | Ano KNG84539.1    | Ano KNG85249.1    |
| Ano KNG87291.1    | Ano KNG88285.1    | Ano KNG88668.1    |
| Ano KNG88685.1    | Ano KNG90368.1    | Ano KNG90587.1    |
| Ano KNG90606.1    | Ano KNG90940.1    | Ano KNG91513.1    |
| Ano KNG89430.1    | Ano KNG91625.1    | Ano KNG84699.1    |
| Ano KNG85583.1    | Ano KNG90546.1    | Ano KNG91681.1    |
| Aot XP002842735.1 |                   |                   |
| Aot XP002843368.1 | Aot XP002843704.1 | Aot XP002844003.1 |
| Aot XP002846667.1 | Aot XP002846808.1 | Aot XP002847329.1 |
| Aot XP002847685.1 | Aot XP002850361.1 | Aot XP002842777.1 |
| Aot XP002843932.1 | Aot XP002847170.1 | Aud GAO81200.1    |
| Aud GAO81231.1    | Aud GAO81330.1    | Aud GAO81771.1    |
| Aud GAO81964.1    | Aud GAO82999.1    | Aud GAO83635.1    |
| Aud GAO85953.1    | Aud GAO85988.1    | Aud GAO86083.1    |
| Aud GAO86285.1    | Aud GAO87672.1    | Aud GAO87681.1    |
| Aud GAO88286.1    | Aud GAO90373.1    | Aud GAO90494.1    |
| Aud GAO90565.1    | Aud GAO81540.1    | Aud GAO86271.1    |
| Cim EAS31150.3    | Cim EAS34545.3    | Cim EAS31990.3    |

|                   |                   |                |
|-------------------|-------------------|----------------|
| Cim EAS37044.3    | Cpo EFW14129.1    | Cpo EFW17358.1 |
| Cpo EFW16137.1    | Cpo EFW22349.1    | Cps KMM64104.1 |
| Cps KMM71000.1    | Cps KMM67662.1    | Cps KMM72316.1 |
| Csu KDN60538.1    | Csu KDN64005.1    | Csu KDN68160.1 |
| Csu KDN68596.1    | Csu KDN71930.1    | Csu KDN72402.1 |
| Csu KDN61564.1    | Csu KDN62563.1    | Csu KDN65093.1 |
| Csu KDN68946.1    | Csu KDN65693.1    | Csu KDN67074.1 |
| Csu KDN70595.1    | Csu KDN72279.1    | Csu KDN68224.1 |
| Csu KDN70032.1    | Csu KDN66389.1    | Csu KDN70949.1 |
| Csu KDN71389.1    | Csu KDN66474.1    | Csu KDN67432.1 |
| Csu KDN68757.1    | Csu KDN69972.1    | Csu KDN70187.1 |
| Csu KDN70914.1    | Csu KDN71859.1    | Csu KDN72352.1 |
| Csu KDN72099.1    | Csu KDN67744.1    | Csu KDN70961.1 |
| Lma XP003834096.1 | Lma XP003842471.1 |                |
| Lma XP003843013.1 | Lma XP003845353.1 |                |
| Lma XP003834103.1 | Lma XP003838273.1 |                |
| Lma XP003844080.1 | Lma XP003844958.1 |                |
| Lma XP003844774.1 | Mac EFY84462.1    | Mac EFY85749.1 |
| Mac EFY88029.1    | Mac EFY85592.1    | Mac EFY92873.1 |
| Mal KHN93792.1    | Mal KHN96044.1    | Mal KHO00577.1 |
| Mal KHN94261.1    | Mal KHN94311.1    | Mal KHN94379.1 |
| MANI_001950       | MANI_020791       | MANI_004781    |
| MANI_006158       | MANI_006250       | MANI_006783    |
| MANI_110051       | MANI_121659       | MANI_023437    |
| MANI_110978       | MANI_012054       | MANI_020125    |
| MANI_021529       | MANI_022470       | MANI_025650    |
| MANI_029455       | Mbr KID59724.1    | Mbr KID61511.1 |
| Mbr KID64201.1    | Mbr KID72760.1    | Mbr KID73874.1 |
| Mbr KID74205.1    | Mbr KID80235.1    | Mbr KID59833.1 |
| Mbr KID61230.1    | Mbr KID66135.1    | Mbr KID67785.1 |
| Mbr KID62105.1    | Mbr KID65387.1    | Mbr KID74161.1 |
| Mbr KID79685.1    | Mbr KID62944.1    | Mbr KID74173.1 |
| Mbr KID75387.1    | Mbr KID71992.1    | Mgu KID81493.1 |
| Mgu KID84050.1    | Mgu KID89863.1    | Mgu KID81569.1 |
| Mgu KID82712.1    | Mgu KID84197.1    | Mgu KID84859.1 |
| Mgu KID81791.1    | Mgu KID82218.1    | Mgu KID82736.1 |
| Mgu KID83952.1    | Mgu KID84093.1    | Mgu KID86635.1 |
| Mgu KID91268.1    | Mgu KID84061.1    | Mgu KID87248.1 |
| Mgu KID91408.1    | Mgu KID86000.1    | Mgu KID86016.1 |
| Mgy EFQ96791.1    | Mgy EFQ96831.1    | Mgy EFQ96902.1 |
| Mgy EFQ96996.1    | Mgy EFQ97313.1    | Mgy EFQ98465.1 |
| Mgy EFR01005.1    | Mgy EFR01671.1    | Mgy EFQ99795.1 |
| Mgy EFR00806.1    | Mgy EFR04190.1    | Mgy EFR04320.1 |
| Mgy EFR04828.1    | Mma KID98764.1    | Mma KID97497.1 |
| Mma KID90834.1    | Mma KID94120.1    | Mma KID94121.1 |
| Mma KID91313.1    | Mma KID96263.1    | Mma KID96316.1 |
| Mma KID97531.1    | Mma KID98721.1    | Mma KID99909.1 |

|                |                |                |
|----------------|----------------|----------------|
| Mma KID93355.1 | Mma KID93652.1 | Mma KID94822.1 |
| Mma KID93461.1 | Mma KIE01334.1 | Mmy KXX72797.1 |
| Mmy KXX74576.1 | Mmy KXX79732.1 | Mmy KXX75271.1 |
| Mmy KXX75424.1 | Mmy KXX75968.1 | Mmy KXX76480.1 |
| Mmy KXX76491.1 | Mmy KXX77494.1 | Mmy KXX79710.1 |
| Mmy KXX82443.1 | Mmy KXX74770.1 | Mmy KXX77535.1 |
| Mmy KXX82904.1 | Mmy KXX75016.1 | Mmy KXX76983.1 |
| Mmy KXX79394.1 | Mmy KXX80750.1 | Mmy KXX81008.1 |
| Mmy KXX82176.1 | Mmy KXX75870.1 | Mmy KXX83260.1 |
| Mmy KXX82669.1 | Mmy KXX80977.1 | Mro EFY94315.2 |
| Mro EFY94437.2 | Mro EFY94573.1 | Mro EFY95891.1 |
| Mro EFY96026.1 | Mro EFY96062.1 | Mro EFY96790.1 |
| Mro EFY98483.1 | Mro EFZ00678.1 | Mro EFZ03715.1 |
| Mro EFY94872.2 | Mro EFY96172.2 | Mro EFY96241.2 |
| Mro EFZ02044.1 | Mro EFZ03354.1 | Mro EFZ04272.1 |
| Mro EFY94490.2 | Mro EFY97775.2 | Mro EFZ02119.2 |
| Mro KHO10995.1 | Mro KHO10996.1 | Npa EOD43154.1 |
| Npa EOD51988.1 | Npa EOD43327.1 | Npa EOD46651.1 |
| Npa EOD50138.1 | Npa EOD43341.1 | Npa EOD43393.1 |
| Npa EOD43397.1 | Npa EOD45881.1 | Npa EOD49628.1 |
| Npa EOD51113.1 | Npa EOD53030.1 | Npa EOD48494.1 |
| Npa EOD47371.1 | Npa EOD51041.1 | Oma KIM92741.1 |
| Oma KIM92842.1 | Oma KIM93266.1 | Oma KIM93865.1 |
| Oma KIM94019.1 | Oma KIM94092.1 | Oma KIM94705.1 |
| Oma KIM94801.1 | Oma KIM95579.1 | Oma KIM95626.1 |
| Oma KIM97074.1 | Oma KIM97314.1 | Oma KIM98589.1 |
| Oma KIM99715.1 | Oma KIM99782.1 | Oma KIN00612.1 |
| Oma KIN05352.1 | Oma KIN05356.1 | Oma KIN05364.1 |
| Oma KIN06913.1 | Oma KIN09038.1 | Oma KIM92883.1 |
| Oma KIM94486.1 | Oma KIM97138.1 | Oma KIM97381.1 |
| Oma KIM99830.1 | Oma KIN02399.1 | Pdi EKV04424.1 |
| Pdi EKV05514.1 | Pdi EKV06858.1 | Pdi EKV11465.1 |
| Pdi EKV12048.1 | Pdi EKV13466.1 | Pdi EKV17385.1 |
| Pdi EKV10561.1 | Pdi EKV19716.1 | Pdi EKV06097.1 |
| Pdi EKV13495.1 | Pdi EKV13692.1 | Pdi EKV18177.1 |
| Psp KFX86927.1 | Psp KFX96803.1 | Psp KFX98712.1 |
| Psp KFY03516.1 | Psp KFX98753.1 | Psp KFY01188.1 |
| Pte EFQ85105.1 | Pte EFQ85729.1 | Pte EFQ86427.1 |
| Pte EFQ87243.1 | Pte EFQ88351.1 | Pte EFQ91289.1 |
| Pte EFQ92322.1 | Pte EFQ92956.1 | Pte EFQ93721.1 |
| Pte EFQ94415.1 | Pte EFQ85730.1 | Pte EFQ90137.1 |
| Pte EFQ90138.1 | Pte EFQ87497.1 | Pte EFQ88531.1 |
| Pte EFQ89733.1 | Pte EFQ92739.1 | Pte EFQ95051.1 |
| Sap KEZ39405.1 | Sap KEZ40049.1 | Sap KEZ40612.1 |
| Sap KEZ41293.1 | Sap KEZ45498.1 | Sap KEZ45627.1 |
| Sap KEZ46536.1 | Sap KEZ40559.1 | Sap KEZ40819.1 |
| Sap KEZ42792.1 | Sap KEZ43366.1 | Tce GAM33530.1 |

|                |                |                |
|----------------|----------------|----------------|
| Tce GAM35872.1 | Tce GAM36828.1 | Tce GAM37528.1 |
| Tce GAM37666.1 | Tce GAM41922.1 | Tce GAM42808.1 |
| Tce GAM44116.1 | Tce GAM35366.1 | Tce GAM41187.1 |
| Tce GAM42162.1 | Tce GAM42968.1 | Tce GAM38546.1 |
| Tce GAM41899.1 | Tce GAM41924.1 | Tce GAM42258.1 |
| Tce GAM42393.1 | Tce GAM40954.1 | The CEJ80659.1 |
| The CEJ86142.1 | The CEJ86637.1 | The CEJ86639.1 |
| The CEJ91944.1 | The CEJ92557.1 | The CEJ81082.1 |
| The CEJ90334.1 | The CEJ94083.1 | The CEJ81590.1 |
| The CEJ86573.1 | The CEJ82961.1 | The CEJ82962.1 |
| The CEJ91945.1 | Tin EZF33319.1 | Tin EZF33403.1 |
| Tin EZF33994.1 | Tin EZF35978.1 | Tin EZF36261.1 |
| Tis CRG82770.1 | Tis CRG86478.1 | Tis CRG86497.1 |
| Tis CRG86530.1 | Tis CRG87308.1 | Tis CRG87892.1 |
| Tis CRG89167.1 | Tis CRG89192.1 | Tis CRG90947.1 |
| Tis CRG90972.1 | Tis CRG92461.1 | Tis CRG92673.1 |
| Tis CRG92715.1 | Tis CRG83422.1 | Tis CRG83700.1 |
| Tis CRG83761.1 | Tis CRG86029.1 | Tis CRG87956.1 |
| Tis CRG90802.1 | Tis CRG90967.1 | Tis CRG91166.1 |
| Tis CRG91965.1 | Tis CRG92280.1 | Tis CRG92723.1 |
| Tis CRG85198.1 | Tis CRG90265.1 | Tma KFX41168.1 |
| Tma KFX41169.1 | Tma KFX44029.1 | Tma KFX41560.1 |
| Tma KFX41251.1 | Tma KFX41252.1 | Tma KFX41383.1 |
| Tma KFX46785.1 | Tma KFX51797.1 | Tma KFX52865.1 |
| Tma KFX43763.1 | Tma KFX43764.1 | Tma KFX44733.1 |
| Tma KFX48303.1 | Tma KFX52867.1 | Top KND86883.1 |
| Top KND86893.1 | Top KND87119.1 | Top KND87310.1 |
| Top KND87695.1 | Top KND88257.1 | Top KND89917.1 |
| Top KND92549.1 | Top KND94632.1 | Top KND87975.1 |
| Tru EGD84902.1 | Tru EGD85602.1 | Tru EGD86527.2 |
| Tru EGD86562.1 | Tru EGD91141.1 | Tso EZF68845.1 |
| Tso EZF71267.1 | Tso EZF72769.1 | Tso EZF72812.1 |
| Tso EZF77964.1 | Tst EED11515.1 | Tst EED11953.1 |
| Tst EED12350.1 | Tst EED13058.1 | Tst EED13571.1 |
| Tst EED13647.1 | Tst EED14251.1 | Tst EED14366.1 |
| Tst EED14393.1 | Tst EED14463.1 | Tst EED15402.1 |
| Tst EED15547.1 | Tst EED15709.1 | Tst EED15802.1 |
| Tst EED16637.1 | Tst EED18128.1 | Tst EED18841.1 |
| Tst EED21572.1 | Tst EED24614.1 | Tst EED16635.1 |
| Tst EED19830.1 | Tst EED21266.1 | Tte AEO62906.1 |
| Tte AEO67408.1 | Tte AEO63908.1 | Tte AEO67303.1 |
| Tte AEO68365.1 | Tte AEO64476.1 | Tte AEO67427.1 |
| Tte AEO68274.1 | Tve EFE38442.1 | Tve EFE41038.1 |
| Tve EFE44178.1 | Tve EFE40994.1 | Tve EFE41543.1 |
| Tve EFE44717.1 | Tve EFE41155.1 | Tin EZF33402.1 |
| Cim KJF61407.1 | Cpo EFW19798.1 | Cps KMM72254.1 |
| Cps KMM72255.1 | Mma KID90835.1 | Tru KFL60619.1 |

|                                                     |                                                                                                                                                                                                                                                                                                                       |                                                                                                                                                                                                                                                                                                             |                                                                                                                                                                                                                                                                                                          |
|-----------------------------------------------------|-----------------------------------------------------------------------------------------------------------------------------------------------------------------------------------------------------------------------------------------------------------------------------------------------------------------------|-------------------------------------------------------------------------------------------------------------------------------------------------------------------------------------------------------------------------------------------------------------------------------------------------------------|----------------------------------------------------------------------------------------------------------------------------------------------------------------------------------------------------------------------------------------------------------------------------------------------------------|
|                                                     | Tso EZF68429.1<br>Mgy EFQ96957.1<br>Tin EZF34624.1<br>The CEJ93554.1<br>Psp KFY00590.1<br>Mbr KID61232.1<br>Top KND87976.1<br>Aot XP002847311.1<br>Ani XP003188800.1<br>Afi EAW24573.1<br>Ani XP003188851.1<br>Npa EOD45514.1<br>Npa EOD51963.1<br>Mac EFY91835.1<br>MANI_0115518<br>Mbr KID75468.1<br>Pdi EKV18176.1 | Tso EZF68430.1<br>Mgy EFQ96958.1<br>Tru EGD86700.2<br>Mac EFY92579.1<br>Mac EFY84245.1<br>Tce GAM41182.1<br>MANI_001951<br>Afu EAL86536.1<br>Afi EAW19771.1<br>Afu EAL86636.1<br>Ano KNG83926.1<br>Mac EFY88214.1<br>Mac EFY88213.1<br>Mma KID95486.1<br>Mro KHO10625.1<br>Mro EFY94354.1<br>Tce GAM36740.1 | Mgy EFQ96956.1<br>Sap KEZ40857.1<br>Tso EZF72989.1<br>Oma KIM92884.1<br>Mma KID96522.1<br>Mma KID96523.1<br>Aud GAO90371.1<br>Ani XP003188799.1<br>Csu KDN72130.1<br>Ani XP003188601.1<br>Aot XP002845180.1<br>Lma XP003841875.1<br>Pdi EKV13493.1<br>Tst EED13941.1<br>Mbr KID73295.1<br>Pdi EKV14022.1 |
| <b>MaTERP1<br/>(MANI_010532)<br/>Backbone gene*</b> | Ach KFH43011.1<br>Aot XP002843072.1<br>Mgu KID82793.1<br>Mro EFY97806.1                                                                                                                                                                                                                                               | Afi EAW24654.1<br>Aud GAO81617.1<br>Mgy EFQ96702.1                                                                                                                                                                                                                                                          | Afu EAL89316.1<br>Mbr KID65418.1<br>Mma KID93904.1                                                                                                                                                                                                                                                       |
| <b>MaTERP1<br/>(MANI_010531)<br/>Backbone gene*</b> | Ach KFH43021.1<br>Aot XP002843067.1<br>Mgu KID82789.1<br>Mro EFY97802.2                                                                                                                                                                                                                                               | Afi EAW24653.1<br>Aud GAO81618.1<br>Mgy EFQ96706.1                                                                                                                                                                                                                                                          | Afu EAL89317.1<br>Mbr KID65414.1<br>Mma KID93897.1                                                                                                                                                                                                                                                       |
| <b>MaTERP1<br/>(MANI_010536)*</b>                   | Ach KFH40562.1<br>Aud GAO81614.1<br>Mma KID93907.1                                                                                                                                                                                                                                                                    | Afi EAW24657.1<br>Mbr KID65421.1<br>Mro EFY97809.1                                                                                                                                                                                                                                                          | Afu EAL89313.1<br>Mgu KID82796.1                                                                                                                                                                                                                                                                         |
| <b>MaTERP1<br/>(MANI_010527)<br/>Backbone gene*</b> | Ach KFH40555.1<br>Aud GAO81615.1<br>Mma KID93908.1                                                                                                                                                                                                                                                                    | Afi EAW24656.1<br>Mbr KID65422.1<br>Mro EFY97810.1                                                                                                                                                                                                                                                          | Afu EAL89314.2<br>Mgu KID82797.1                                                                                                                                                                                                                                                                         |
| <b>MaTERP1<br/>(MANI_010537)*</b>                   | Ach KFH43032.1<br>Aot XP002843073.1<br>Mgu KID82794.1<br>Mro EFY97807.1                                                                                                                                                                                                                                               | Afi EAW24659.1<br>Aud GAO81612.1<br>Mgy EFQ96701.1                                                                                                                                                                                                                                                          | Afu EAL89311.1<br>Mbr KID65419.1<br>Mma KID93905.1                                                                                                                                                                                                                                                       |
| <b>MaTERP1<br/>(MANI_010530)<br/>Backbone gene*</b> | Ach KFH43043.1<br>Aot XP002843068.1<br>Mgu KID82790.1<br>Mro EFY97803.1                                                                                                                                                                                                                                               | Afi EAW24658.1<br>Aud GAO81613.1<br>Mgy EFQ96705.1                                                                                                                                                                                                                                                          | Afu EAL89312.1<br>Mbr KID65415.1<br>Mma KID93898.1                                                                                                                                                                                                                                                       |
| <b>MaTERP1<br/>(MANI_010495)*</b>                   | Ach KFH43040.1<br>Aud GAO81619.1<br>Mgy EFQ96704.1                                                                                                                                                                                                                                                                    | Afi EAW24652.1<br>Mbr KID65416.1<br>Mma KID93899.1                                                                                                                                                                                                                                                          | Afu EAL89318.1<br>Mgu KID82791.1<br>Mro EFY97804.1                                                                                                                                                                                                                                                       |
| <b>MaTERP1<br/>(MANI_010512)*</b>                   | MANI_025019<br>Mgu KID82795.1<br>Mro EFY97808.1<br>Afi EAW24660.1                                                                                                                                                                                                                                                     | Mbr KID63604.1<br>Mgu KID85770.1<br>Abe EFE36095.1<br>Afu EAL89310.1                                                                                                                                                                                                                                        | Mbr KID65420.1<br>Mro EFY95587.1<br>Ach KFH43984.1<br>Aot XP002846965.1                                                                                                                                                                                                                                  |

|                                                                                        |                                                                                                                                                                                                                                                                |                                                                                                                                                                                                                                                             |                                                                                                                                                                                                                                           |
|----------------------------------------------------------------------------------------|----------------------------------------------------------------------------------------------------------------------------------------------------------------------------------------------------------------------------------------------------------------|-------------------------------------------------------------------------------------------------------------------------------------------------------------------------------------------------------------------------------------------------------------|-------------------------------------------------------------------------------------------------------------------------------------------------------------------------------------------------------------------------------------------|
|                                                                                        | Aud GAO81611.1<br>Mgy EFQ99030.1<br>Oma KIM93336.1<br>Top KND92088.1<br>Aud GAO90117.1<br>Top KND92083.                                                                                                                                                        | Mac EFY86899.1<br>Mma KID93906.1<br>The CEJ93288.1<br>Tso EZF72233.1<br>Oma KIM93571.1                                                                                                                                                                      | Mal KHN94024.1<br>Npa EOD52809.1<br>Tin EZF34275.1<br>Tve EFE43788.1<br>Mma KID80879.1                                                                                                                                                    |
| <b>MaTERP1<br/>(MANI_010594)*</b>                                                      | Ach KFH43025.1<br>Aot XP002843071.1<br>Mgu KID82792.1<br>Mro EFY97805.1                                                                                                                                                                                        | Afi EAW24655.1<br>Aud GAO81616.1<br>Mgy EFQ96703.1                                                                                                                                                                                                          | Afu EAL89315.1<br>Mbr KID65417.1<br>Mma KID93903.1                                                                                                                                                                                        |
| <b>Transcription factor<br/>embedded in MaPKS1<br/>cluster<br/>(MANI_112402)</b>       | Tma KFX45543.1<br>Tma KFX45546.1<br>Ach KFH44401.1<br>Cim EAS31607.3<br>Lma XP003843017.1<br>Mmy KXX77532.1<br>Psp KFY01609.1<br>Top KND87343.1<br>Ani XP001395307.2<br>Mgu KID83467.1<br>Pte EFQ92323.1<br>Top KND88237.1<br>Aud GAO81772.1<br>Tce GAM33972.1 | Tma KFX45544.1<br>Tma KFX45547.1<br>Acl EAW15012.1<br>Cpo EFW23250.1<br>Mal KHN98029.1<br>Npa EOD53046.1<br>Tce GAM33907.1<br>Tst EED13248.1<br>Mac EFY89368.1<br>Mro EFY96639.1<br>The CEJ92460.1<br>Ani XP001393502.1<br>The CEJ91586.1<br>Tst EED22652.1 | Tma KFX45545.1<br>Ani XP001395290.1<br>Ano KNG91357.1<br>Cps KMM68122.1<br>Mma KID99277.1<br>Oma KIM94093.1<br>Tis CRG91749.1<br>Tte AEO67302.1<br>Mbr KID72944.1<br>Pdi EKV19054.1<br>Tma KFX46639.1<br>Ano KNG85002.1<br>Tst EED12116.1 |
| <b>Transcription factor<br/>embedded in MaNRPS-<br/>PKS2 cluster<br/>(MANI_018928)</b> | Afi EAW19778.1<br>Ano KNG84526.1<br>Top KND88287.1                                                                                                                                                                                                             | Afu EAL85124.1<br>Mbr KID73871.1<br>Tte AEO64233.1                                                                                                                                                                                                          | Aud GAO86281.1<br>Mro EFY96238.2                                                                                                                                                                                                          |

**Table 1:** Abe| *Arthroderma benhamiae* CBS 112371, Ach| *Acremonium chrysogenum* ATCC 11550, Acl| *Aspergillus clavatus* NRRL 1, Afi| *Aspergillus fischeri* NRRL 181, Afu| *Aspergillus fumigatus* Af293, Ani| *Aspergillus niger* CBS 513.88, Ano| *Aspergillus nomius* NRRL 13137, Aot| *Arthroderma otae* CBS 113480, Aud| *Aspergillus udagawae*, Cim| *Coccidioides immitis* RS, Cpo| *Coccidioides posadasii str. Silveira*, Cps| *Coccidioides posadasii* RMSCC 3488, Csu| *Colletotrichum sublineola*, Lma| *Leptosphaeria maculans* JN3, Mac| *Metarhizium acridum* CQMa 102, Mal| *Metarhizium album* ARSEF 1941, MANI *Metarhizium anisopliae* E6, Mbr| *Metarhizium brunneum* ARSEF 3297, Mgu| *Metarhizium guizhouense* ARSEF 977, Mgy| *Microsporium gypseum* CBS 118893, Mma| *Metarhizium majus* ARSEF 297, Mmy| *Madurella mycetomatis*, Mro| *Metarhizium robertsii* ARSEF 23, Npa| *Neofusicoccum parvum* UCRNP2, Oma| *Oidiodendron maius* Zn, Pdi| *Penicillium digitatum* PHI26, Psp| *Pseudogymnoascus sp.* VKM F-3557, Pte| *Pyrenophora teres f. teres* 0-1, Sap| *Scedosporium*

*apiospermum*, Tce| *Talaromyces cellulolyticus*, The| *Torrubiella hemipterigena*, Tin| *Trichophyton interdigitale* H6, Tis| *Talaromyces islandicus*, Tma| *Talaromyces marneffe* PM1, Top| *Tolypocladium ophioglossoides* CBS 100239, Tru| *Trichophyton rubrum* CBS 118892, Tso| *Trichophyton soudanense* CBS 452.61, Tst| *Talaromyces stipitatus* ATCC 10500, Tte| *Thielavia terrestris* NRRL 8126, Tve| *Trichophyton verrucosum* HKI 0517. \*Only genes with  $\geq 45$  % identity were used for phylogeny;
