# Supplementary material for: Secondary metabolite gene clusters in the entomopathogen fungus Metarhizium anisopliae: genome identification and patterns of expression in a cuticle infection model
Source: PubMed Central journal article supplement (PMC5088523; doi:10.1186/s12864-016-3067-6), 2016-10-25
Supplement: 12864_2016_3067_MOESM7_ESM.pdf [file 12864_2016_3067_MOESM7_ESM.pdf]

**Additional File 7:** Best-fit evolutionary models predicted with Prottest 3.4 or jmodeltest-2.1.9 for each alignment.

| Locus tag/Gene/Tree       | Model     |
|---------------------------|-----------|
| MaNRPS-PKS2 (MANI_018878) | JTT+I+G+F |
| MaPKS1 (MANI_014762)      | LG+I+G+F  |
| MaTERP1 (MANI_010532)     | LG+G      |
| MaTERP1 (MANI_010531)     | LG+I+G+F  |
| MaTERP1 (MANI_010536)     | LG+I+G+F  |
| MaTERP1 (MANI_010537)     | JTT+G+F   |
| MaTERP1 (MANI_010495)     | LG+I+G+F  |
| MaTERP1 (MANI_010530)     | LG+I+G+F  |
| MaTERP1 (MANI_010594)     | LG+G+F    |
| MaTERP1 (MANI_010512)     | LG+G+F    |
| MaTERP1 (MANI_010527)     | LG+G+F    |
| <i>tef1</i>               | GTR+I+G   |
| supermatrix               | JTT+G     |
| All PKS tree              | LG+I+G+F  |
