# Supplementary material for: Secondary metabolite gene clusters in the entomopathogen fungus Metarhizium anisopliae: genome identification and patterns of expression in a cuticle infection model
Source: PubMed Central journal article supplement (PMC5088523; doi:10.1186/s12864-016-3067-6), 2016-10-25
Supplement: 12864_2016_3067_MOESM8_ESM.pdf [file 12864_2016_3067_MOESM8_ESM.pdf]

**Additional File 8:** The partially conserved cluster found in *A. chrysogenum* and species from the *Arthroderma* genus is putatively linked to fusidic acid biosynthesis.

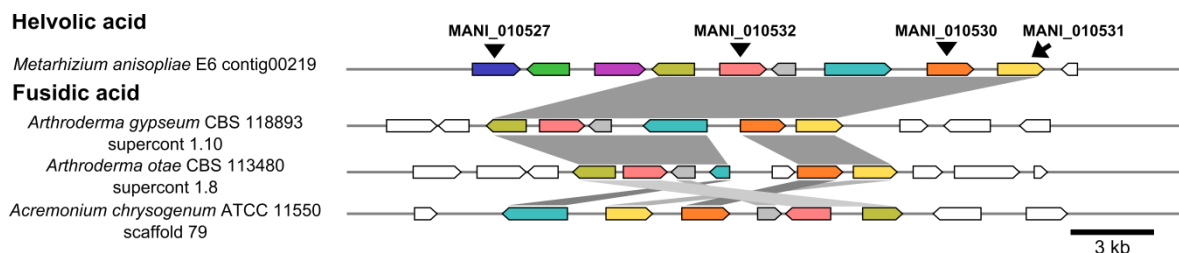

**Figure 1:** The search for orthologous of MaTERP1 (helvolic acid cluster) has found that this cluster is partially conserved in species from the *Arthroderma* genus and *Acremonium chrysogenum* (Hypocreales: Hypocreaceae). However, this partially conserved cluster was suggested to produce fusidic acid, a molecule similar to helvolic acid, this is supported by isolation of fusidic acid-like compounds from *Acremonium* spp. [1, 2].

1. Evans L, Hedger JN, Brayford D, Stavri M, Smith E, O'Donnell G, Gray AI, Griffith GW, Gibbons S: **An antibacterial hydroxy fusidic acid analogue from *Acremonium crocinigenum***. *Phytochemistry* 2006, **67**(19):2110-2114.
2. Lodeiro S, Xiong QB, Wilson WK, Ivanova Y, Smith ML, May GS, Matsuda SPT: **Protostadienol Biosynthesis and Metabolism in the Pathogenic Fungus *Aspergillus fumigatus***. *Organic Letters* 2009, **11**(6):1241-1244.
