# Supplementary material for: Secondary metabolite gene clusters in the entomopathogen fungus Metarhizium anisopliae: genome identification and patterns of expression in a cuticle infection model
Source: PubMed Central journal article supplement (PMC5088523; doi:10.1186/s12864-016-3067-6), 2016-10-25
Supplement: 12864_2016_3067_MOESM10_ESM.pdf [file 12864_2016_3067_MOESM10_ESM.pdf]

**Additional File 10:** Overview of the BGCs in *M. anisopliae* E6, their domain structures, and conservation among six *Metarhizium* species.

| Cluster/<br>Backbone gene | MAR | MAC | MAM | MAJ | MGU | MBR | Product/Alt. names                         | Locus tag   | 48hCx48hl | 48hlx144hl | Backbone gene domains                 |
|---------------------------|-----|-----|-----|-----|-----|-----|--------------------------------------------|-------------|-----------|------------|---------------------------------------|
| MaNRPS1                   |     |     |     |     |     |     | Destruxin                                  | MANI_024437 | Up        | Down       | A C A E C A C A C A M C A M C         |
| MaNRPS2                   |     |     |     |     |     |     | Serinocyclin                               | MANI_020119 | ND        | Down       | A C C A C A C A C A E C A C A E C A C |
| MaNRPS3                   |     |     |     |     |     |     |                                            | MANI_011572 | NA        | NA         | C A E C A                             |
| MaNRPS4                   |     |     |     |     |     |     |                                            | MANI_020971 | NA        | NA         | A C A E C                             |
| MaNRPS5                   |     |     |     |     |     |     |                                            | MANI_004659 | NA        | NA         | C A C                                 |
| MaNRPS6                   |     |     |     |     |     |     |                                            | MANI_004647 | ND        | ND         | A C A C A E C A C A E C A C A E C A C |
| MaNRPS7                   |     |     |     |     |     |     |                                            | MANI_010631 | Up        | ND         | C A C                                 |
| MaNRPS8                   |     |     |     |     |     |     | Metachelin                                 | MANI_003049 | Down      | NA         | A C C                                 |
| MaNRPS9                   |     |     |     |     |     |     | Ferricrocin                                | MANI_117325 | Up        | ND         | C A C C C                             |
| MaNRPS10                  |     |     |     |     |     |     |                                            | MANI_003902 | NA        | NA         | A C A E C C                           |
| MaNRPS11                  |     |     |     |     |     |     |                                            | MANI_006947 | ND        | Down       | A C A C A E C A C A E C A E C A C A C |
| MaNRPS12                  |     |     |     |     |     |     |                                            | MANI_006155 | NA        | NA         | A E C A C A C A E C                   |
| MaNRPS13                  |     |     |     |     |     |     |                                            | MANI_008843 | NA        | NA         | A C A C A C A                         |
| MaPKS1                    |     |     |     |     |     |     | Tropolone<br>/citrinin-related<br>compound | MANI_014762 | Up        | ND         | KS AT AC MT TD                        |
| MaPKS2                    |     |     |     |     |     |     | Aurovertin                                 | MANI_004781 | NA        | NA         | KS AT DH MT KR AC                     |
| MaPKS3                    |     |     |     |     |     |     |                                            | MANI_011575 | NA        | NA         | KS AT DH AC TE                        |
| MaPKS4                    |     |     |     |     |     |     |                                            | MANI_110051 | NA        | NA         | KS AT DH MT ER KR                     |
| MaPKS5*                   |     |     |     |     |     |     |                                            | MANI_027199 | NA        | NA         | KS DH AT DH                           |
| MaPKS6*                   |     |     |     |     |     |     |                                            | MANI_010100 | NA        | NA         | KS AT DH                              |
| MaPKS7                    |     |     |     |     |     |     |                                            | MANI_020125 | NA        | NA         | KS AT DH MT ER KR AC                  |
| MaPKS8                    |     |     |     |     |     |     | MrPKS2                                     | MANI_028434 | NA        | NA         | KS AT DH AC AC TE                     |
| MaPKS9                    |     |     |     |     |     |     | Viridicatumtoxin                           | MANI_003768 | NA        | NA         | KS AT AC                              |
| MaPKS10                   |     |     |     |     |     |     |                                            | MANI_019155 | Down      | Down       | A AC KS AT KR AC TD                   |
| MaPKS11                   |     |     |     |     |     |     |                                            | MANI_006783 | NA        | NA         | KS AT DH MT KR AC                     |
| MaPKS12                   |     |     |     |     |     |     |                                            | MANI_110978 | NA        | NA         | KS AT DH MT ER KR                     |
| MaPKS13                   |     |     |     |     |     |     |                                            | MANI_006250 | ND        | ND         | KS AT DH MT ER KR AC                  |
| MaPKS14                   |     |     |     |     |     |     |                                            | MANI_018879 | Up        | Down       | KS AT DH AC                           |

|             |  |  |  |  |  |                                    |                                                             |      |      |                              |
|-------------|--|--|--|--|--|------------------------------------|-------------------------------------------------------------|------|------|------------------------------|
| MaPKS15     |  |  |  |  |  |                                    | MANI_021529                                                 | NA   | NA   | KS AT DH ER KR AC            |
| MaPKS16     |  |  |  |  |  |                                    | MANI_029455                                                 | NA   | NA   | KS AT DH ER KR AC            |
| MaPKS17     |  |  |  |  |  |                                    | MANI_025650                                                 | Up   | Down | KS AT DH ER KR               |
| MaPKS18     |  |  |  |  |  |                                    | MANI_010451                                                 | Up   | Down | KS AT AC                     |
| MaPKS19     |  |  |  |  |  |                                    | MANI_012054                                                 | ND   | ND   | KS AT DH ER KR AC            |
| MaPKS20     |  |  |  |  |  | MrPKS1                             | MANI_122426                                                 | NA   | NA   | KS AT AC AC TE               |
| MaPKS21     |  |  |  |  |  |                                    | MANI_006397/<br>MANI_006388                                 | NA   | NA   | ER KR AC DH ER               |
| MaPKS22     |  |  |  |  |  |                                    | MANI_017297                                                 | ND   | ND   | AT KS AC                     |
| MaNRPS-PKS1 |  |  |  |  |  | NG39x                              | MANI_020791                                                 | Up   | Down | KS AT DH MT KR AC C A   TD   |
| MaNRPS-PKS2 |  |  |  |  |  | Pseurotin-related compound         | MANI_018878                                                 | Up   | Down | KS AT DH KR C A   TD         |
| MaNRPS-PKS3 |  |  |  |  |  | Xenolozoyenone-related compound    | MANI_023437                                                 | Down | Down | KS AT DH ER KR C A   TD      |
| MaNRPS-PKS4 |  |  |  |  |  |                                    | MANI_022470/<br>MANI_022473                                 | ND   | ND   | KS AT DH MT ER KR AC C A   G |
| MaNRPS-PKS5 |  |  |  |  |  |                                    | MANI_006158                                                 | NA   | NA   | KS AT DH MT KR C A           |
| MaNRPS-PKS6 |  |  |  |  |  |                                    | MANI_010456/<br>MANI_121659                                 | NA   | NA   | A   C A KS AT DH MT ER       |
| MaNRPS-PKS7 |  |  |  |  |  |                                    | MANI_001951/<br>MANI_001950                                 | NA   | NA   | AT DH MT KR C A   TD         |
| MaTERP1     |  |  |  |  |  | Helvolic acid                      | MANI_010532/<br>MANI_010527/<br>MANI_010530/<br>MANI_010531 | Up   | Down |                              |
| MaTERP2     |  |  |  |  |  | Lanosterol cyclase                 | MANI_002110                                                 | Up   | ND   |                              |
| MaTERP3     |  |  |  |  |  |                                    | MANI_027216                                                 | NA   | NA   |                              |
| MaTERP4     |  |  |  |  |  |                                    | MANI_116096                                                 | ND   | ND   |                              |
| MaTERP5     |  |  |  |  |  | GGPP synthase                      | MANI_024139                                                 | ND   | ND   |                              |
| MaTERP6     |  |  |  |  |  |                                    | MANI_020049                                                 | ND   | ND   |                              |
| MaTERP7     |  |  |  |  |  |                                    | MANI_020253                                                 | NA   | NA   |                              |
| MaTERP8     |  |  |  |  |  |                                    | MANI_027397                                                 | NA   | NA   |                              |
| MaTERP9     |  |  |  |  |  |                                    | MANI_022959                                                 | ND   | Down |                              |
| MaIND1      |  |  |  |  |  |                                    | MANI_023817                                                 | Up   | Down |                              |
| MaIND2      |  |  |  |  |  |                                    | MANI_004342                                                 | NA   | NA   |                              |
| MaIND3      |  |  |  |  |  |                                    | MANI_024963                                                 | NA   | NA   |                              |
| MaSID1      |  |  |  |  |  |                                    | MANI_004303                                                 | NA   | NA   |                              |
| MaIND-TERP1 |  |  |  |  |  | Terpendole E/<br>Lolitrein-related | MANI_011022                                                 | NA   | NA   |                              |

|                        |           |           |           |                                   |           |           | compound                                        |             |                                      |             |                               |
|------------------------|-----------|-----------|-----------|-----------------------------------|-----------|-----------|-------------------------------------------------|-------------|--------------------------------------|-------------|-------------------------------|
| MaIND-NRPS1            |           |           |           |                                   |           |           | Elymoclavine/<br>Ergovaline-related<br>compound | MANI_029655 | NA                                   | NA          | A C TD                        |
| MaIND-NRPS2            |           |           |           |                                   |           |           |                                                 | MANI_122478 | NA                                   | NA          | C A C                         |
| MaTERP-PKS1            |           |           |           |                                   |           |           |                                                 | MANI_006324 | NA                                   | NA          | KS AT MT                      |
| MaOTHER1               |           |           |           |                                   |           |           |                                                 | MANI_007147 | <b>Down</b>                          | <b>ND</b>   |                               |
| MaOTHER2               |           |           |           |                                   |           |           |                                                 | MANI_109737 | <b>ND</b>                            | <b>ND</b>   |                               |
| MaOTHER3               |           |           |           |                                   |           |           |                                                 | MANI_004951 | <b>ND</b>                            | <b>ND</b>   |                               |
| MaOTHER4               |           |           |           |                                   |           |           |                                                 | MANI_019946 | <b>ND</b>                            | <b>ND</b>   |                               |
| MaOTHER5               |           |           |           |                                   |           |           |                                                 | MANI_018009 | NA                                   | NA          |                               |
| MaOTHER6               |           |           |           |                                   |           |           |                                                 | MANI_117972 | <b>ND</b>                            | <b>ND</b>   |                               |
| MaOTHER7               |           |           |           |                                   |           |           |                                                 | MANI_000865 | NA                                   | NA          |                               |
| MaOTHER8               |           |           |           |                                   |           |           |                                                 | MANI_000852 | <b>Up</b>                            | <b>ND</b>   |                               |
| MaOTHER9               |           |           |           |                                   |           |           |                                                 | MANI_024071 | NA                                   | NA          |                               |
| MaOTHER10              |           |           |           |                                   |           |           |                                                 | MANI_011653 | NA                                   | NA          |                               |
| MaOTHER11              |           |           |           |                                   |           |           |                                                 | MANI_026624 | <b>Down</b>                          | <b>ND</b>   |                               |
| MaOTHER12              |           |           |           |                                   |           |           |                                                 | MANI_010482 | <b>Up</b>                            | <b>Down</b> |                               |
| MaOTHER13              |           |           |           |                                   |           |           |                                                 | MANI_025168 | <b>Up</b>                            | <b>ND</b>   |                               |
| MaOTHER14              |           |           |           |                                   |           |           |                                                 | MANI_122490 | NA                                   | NA          |                               |
| <b>TOTAL= 73</b>       | <b>69</b> | <b>35</b> | <b>30</b> | <b>61</b>                         | <b>64</b> | <b>70</b> |                                                 |             |                                      |             |                               |
| <b>A</b> Adenylation   |           |           |           | <b> </b> Peptidyl carrier protein |           |           | <b>AT</b> Acyltransferase                       |             | <b>ER</b> Enoylreductase             |             | <b>TD</b> Thioester reductase |
| <b>C</b> Condensation  |           |           |           | <b>M</b> N-Methylation            |           |           | <b>AC</b> Acyl carrier protein                  |             | <b>MT</b> Methyltransferase O- or C- |             | <b>KR</b> Ketoreductase       |
| <b>E</b> Epimerization |           |           |           | <b>KS</b> Keto-synthase           |           |           | <b>DH</b> Dehydratase                           |             | <b>TE</b> Thioesterase               |             |                               |

*M. robertsii* ARSEF23 (MAR), *M. acridum* CQMa102 (MAC), *M. album* ARSEF1941 (MAM), *M. majus* ARSEF297 (MAJ), *M. guizhouense* ARSEF977 (MGU) and *M. brunneum* ARSEF3297 (MBR). Known products as well as alternative names and locus tags of the backbone genes are also listed. Relative changes in expression levels were estimated after 48 hours for the control condition (hC) and both 48 and 144 hours for infection conditions (hI). NA: Not Available. ND: No Difference. \* The backbone gene appears to be truncated.
