# Supplementary material for: Secondary metabolite gene clusters in the entomopathogen fungus Metarhizium anisopliae: genome identification and patterns of expression in a cuticle infection model
Source: PubMed Central journal article supplement (PMC5088523; doi:10.1186/s12864-016-3067-6), 2016-10-25
Supplement: 12864_2016_3067_MOESM11_ESM.pdf [file 12864_2016_3067_MOESM11_ESM.pdf]

**Additional File 11: Expression profile of predicted BGCs.**

**Table 1: Expression profiling of the MaNRPS2 cluster (Serinocyclin).**

| NCBI's gene locus ID | Expression (RPKM) |       |        | Differential expression (log2-fold change) |            |
|----------------------|-------------------|-------|--------|--------------------------------------------|------------|
|                      | 48hC              | 48hl  | 144hl  | 48hCx48hl                                  | 48hlx144hl |
| MANI_020146          | 39.27             | 20.86 | 16.60  | NA                                         | NA         |
| MANI_020153          | 3.28              | 0.00  | 0.00   | NA                                         | NA         |
| MANI_020163          | 83.85             | 2.50  | 13.55  | -4.78                                      | 2.46       |
| MANI_020161          | 0.00              | 0.90  | 2.74   | NA                                         | NA         |
| MANI_020136          | 5.00              | 11.18 | 2.27   | 1.25                                       | -2.21      |
| MANI_020119          | 14.72             | 10.71 | 4.77   | NA                                         | -1.09      |
| MANI_115536          | 0.00              | 7.42  | 0.00   | NA                                         | NA         |
| MANI_020154          | 0.00              | 1.66  | 0.00   | NA                                         | NA         |
| MANI_020156          | 0.88              | 0.00  | 0.00   | NA                                         | NA         |
| MANI_020147          | 1.69              | 0.91  | 0.00   | NA                                         | NA         |
| MANI_020164          | 0.00              | 1.92  | 0.00   | NA                                         | NA         |
| MANI_020155          | 9.37              | 37.12 | 2.56   | 2.09                                       | -3.75      |
| MANI_020139          | 33.07             | 36.39 | 33.99  | NA                                         | NA         |
| MANI_020162          | 24.84             | 15.84 | 8.47   | NA                                         | NA         |
| MANI_020151          | 32.58             | 91.15 | 163.66 | 1.58                                       | NA         |
| MANI_029315          | 5.81              | 15.61 | 92.76  | 1.54                                       | 2.52       |

**Table 2: Expression profiling of the MaOTHER1 cluster.**

| NCBI's gene locus ID | Expression (RPKM) |       |       | Differential expression (log2-fold change) |            |
|----------------------|-------------------|-------|-------|--------------------------------------------|------------|
|                      | 48hC              | 48hl  | 144hl | 48hCx48hl                                  | 48hlx144hl |
| MANI_007159          | 17.87             | 34.95 | 64.73 | NA                                         | NA         |
| MANI_007149          | 39.73             | 20.00 | 28.13 | NA                                         | NA         |
| MANI_026611          | 96.44             | 23.48 | 18.35 | -1.90                                      | NA         |

|                    |       |       |       |       |    |
|--------------------|-------|-------|-------|-------|----|
| <b>MANI_007147</b> | 24.95 | 5.81  | 4.43  | -1.99 | NA |
| <b>MANI_026610</b> | 9.99  | 10.45 | 10.62 | NA    | NA |

The BGC boundaries were delimited by CASSIS.

**Table 3: Expression profiling of the MaOTHER2 cluster.**

| NCBI's gene locus ID | Expression (RPKM) |        |        | Differential expression (log2-fold change) |            |
|----------------------|-------------------|--------|--------|--------------------------------------------|------------|
|                      | 48hC              | 48hl   | 144hl  | 48hCx48hl                                  | 48hlx144hl |
| <b>MANI_109737</b>   | 0.00              | 4.81   | 0.98   | NA                                         | NA         |
| <b>MANI_007750</b>   | 0.00              | 0.00   | 0.84   | NA                                         | NA         |
| <b>MANI_131937</b>   | 0.00              | 0.00   | 1.71   | NA                                         | NA         |
| <b>MANI_007754</b>   | 136.01            | 214.67 | 220.69 | NA                                         | NA         |
| <b>MANI_007753</b>   | 285.59            | 207.31 | 336.46 | NA                                         | NA         |

**Table 4: Expression profiling of the MaNRPS-PKS3 cluster (Xenolozoyenone-related compound).**

| NCBI's gene locus ID | Expression (RPKM) |       |       | Differential expression (log2-fold change) |            |
|----------------------|-------------------|-------|-------|--------------------------------------------|------------|
|                      | 48hC              | 48hl  | 144hl | 48hCx48hl                                  | 48hlx144hl |
| <b>MANI_023523</b>   | 40.29             | 10.67 | 4.07  | -1.74                                      | -1.35      |
| <b>MANI_023437</b>   | 11.23             | 1.59  | 0.62  | -2.68                                      | -1.30      |
| <b>MANI_030051</b>   | 6.43              | 6.62  | 4.10  | NA                                         | NA         |
| <b>MANI_030058</b>   | 0.69              | 0.00  | 0.00  | NA                                         | NA         |
| <b>MANI_023546</b>   | 4.74              | 3.82  | 1.67  | NA                                         | NA         |
| <b>MANI_023568</b>   | 3.27              | 1.32  | 1.34  | NA                                         | NA         |
| <b>MANI_023497</b>   | 0.00              | 0.00  | 0.00  | NA                                         | NA         |
| <b>MANI_023527</b>   | 2.24              | 2.25  | 6.42  | NA                                         | 1.48       |

The BGC boundaries were delimited by CASSIS.

**Table 5: Expression profiling of the MaIND1 cluster.**

| NCBI's gene locus ID | Expression (RPKM) |       |       | Differential expression (log2-fold change) |            |
|----------------------|-------------------|-------|-------|--------------------------------------------|------------|
|                      | 48hC              | 48hl  | 144hl | 48hCx48hl                                  | 48hlx144hl |
| MANI_023817          | 0.74              | 13.71 | 6.06  | 4.04                                       | -1.13      |
| MANI_030140          | 4.11              | 3.49  | 3.90  | NA                                         | NA         |
| MANI_113953          | 39.08             | 0.95  | 1.45  | -5.03                                      | NA         |
| MANI_023814          | 1.07              | 0.29  | 0.00  | NA                                         | NA         |

The BGC boundaries were delimited by CASSIS.

**Table 6: Expression profiling of the MaPKS2 cluster (Aurovertin).**

| NCBI's gene locus ID | Expression (RPKM) |       |       | Differential expression (log2-fold change) |            |
|----------------------|-------------------|-------|-------|--------------------------------------------|------------|
|                      | 48hC              | 48hl  | 144hl | 48hCx48hl                                  | 48hlx144hl |
| MANI_004840          | 0.00              | 0.00  | 0.00  | NA                                         | NA         |
| MANI_004781          | 1.66              | 0.19  | 0.00  | NA                                         | NA         |
| MANI_114236          | 0.00              | 0.00  | 0.00  | NA                                         | NA         |
| MANI_004795          | 0.54              | 0.44  | 0.00  | NA                                         | NA         |
| MANI_004789          | 2.46              | 3.30  | 2.01  | NA                                         | NA         |
| MANI_114238          | 0.00              | 0.00  | 0.00  | NA                                         | NA         |
| MANI_124919          | 0.00              | 0.00  | 0.00  | NA                                         | NA         |
| MANI_004822          | 0.00              | 5.32  | 0.68  | NA                                         | NA         |
| MANI_004785          | 0.00              | 0.00  | 0.00  | NA                                         | NA         |
| MANI_004787          | 0.00              | 0.00  | 0.00  | NA                                         | NA         |
| MANI_026081          | 9.41              | 1.17  | 0.30  | -2.79                                      | NA         |
| MANI_004841          | 96.96             | 44.17 | 50.18 | NA                                         | NA         |
| MANI_004827          | 3.27              | 3.30  | 6.04  | NA                                         | NA         |
| MANI_124927          | 1.83              | 1.47  | 0.00  | NA                                         | NA         |
| MANI_004821          | 1.52              | 0.00  | 0.62  | NA                                         | NA         |
| MANI_114246          | 0.00              | 0.00  | 0.00  | NA                                         | NA         |
| MANI_004807          | 68.73             | 28.78 | 12.16 | -1.12                                      | -1.21      |
| MANI_004844          | 22.42             | 61.91 | 34.12 | 1.59                                       | NA         |

|                    |        |       |       |       |    |
|--------------------|--------|-------|-------|-------|----|
| <b>MANI_004776</b> | 53.60  | 30.98 | 20.79 | NA    | NA |
| <b>MANI_004777</b> | 22.95  | 6.88  | 8.48  | -1.57 | NA |
| <b>MANI_004778</b> | 133.95 | 80.25 | 79.03 | NA    | NA |

The BGC boundaries were delimited by CASSIS.

**Table 7: Expression profiling of the MaNRPS3 cluster.**

| NCBI's gene locus ID | Expression (RPKM) |       |       | Differential expression (log2-fold change) |            |
|----------------------|-------------------|-------|-------|--------------------------------------------|------------|
|                      | 48hC              | 48hl  | 144hl | 48hCx48hl                                  | 48hlx144hl |
| <b>MANI_027530</b>   | 0.00              | 0.00  | 0.00  | NA                                         | NA         |
| <b>MANI_027532</b>   | 0.00              | 0.00  | 0.00  | NA                                         | NA         |
| <b>MANI_011622</b>   | 0.00              | 0.00  | 0.00  | NA                                         | NA         |
| <b>MANI_011572</b>   | 0.00              | 0.37  | 0.00  | NA                                         | NA         |
| <b>MANI_027526</b>   | 0.00              | 1.09  | 0.19  | NA                                         | NA         |
| <b>MANI_011609</b>   | 3.60              | 18.83 | 1.47  | 2.46                                       | -3.51      |
| <b>MANI_114418</b>   | 0.00              | 0.00  | 0.00  | NA                                         | NA         |
| <b>MANI_011644</b>   | 0.00              | 0.00  | 0.00  | NA                                         | NA         |
| <b>MANI_011593</b>   | 0.00              | 0.00  | 0.00  | NA                                         | NA         |

**Table 8: Expression profiling of the MaPKS3 cluster.**

| NCBI's gene locus ID | Expression (RPKM) |        |        | Differential expression (log2-fold change) |            |
|----------------------|-------------------|--------|--------|--------------------------------------------|------------|
|                      | 48hC              | 48hl   | 144hl  | 48hCx48hl                                  | 48hlx144hl |
| <b>MANI_027534</b>   | 0.59              | 39.58  | 9.20   | 5.86                                       | -2.05      |
| <b>MANI_027538</b>   | 0.00              | 132.34 | 210.52 | 8.68                                       | NA         |
| <b>MANI_011630</b>   | 0.00              | 64.38  | 38.76  | 6.69                                       | NA         |
| <b>MANI_027536</b>   | 0.00              | 6.93   | 0.00   | NA                                         | NA         |
| <b>MANI_011575</b>   | 0.68              | 0.22   | 0.22   | NA                                         | NA         |
| <b>MANI_011615</b>   | 7.99              | 747.98 | 415.37 | 6.65                                       | NA         |
| <b>MANI_011585</b>   | 0.00              | 0.00   | 0.00   | NA                                         | NA         |

|             |      |      |      |    |    |
|-------------|------|------|------|----|----|
| MANI_011587 | 0.00 | 0.00 | 0.00 | NA | NA |
| MANI_011645 | 0.00 | 0.00 | 0.00 | NA | NA |
| MANI_011623 | 0.98 | 0.79 | 0.00 | NA | NA |

Table 9: Expression profiling of the MaNRPS4 cluster.

| NCBI's gene locus ID | Expression (RPKM) |        |        | Differential expression (log2-fold change) |            |
|----------------------|-------------------|--------|--------|--------------------------------------------|------------|
|                      | 48hC              | 48hl   | 144hl  | 48hCx48hl                                  | 48hlx144hl |
| MANI_029521          | 0.00              | 0.00   | 0.00   | NA                                         | NA         |
| MANI_021152          | 2.00              | 130.76 | 239.85 | 5.82                                       | 0.97       |
| MANI_021040          | 1.51              | 10.53  | 0.00   | 2.81                                       | -6.68      |
| MANI_021047          | 0.00              | 0.49   | 3.01   | NA                                         | NA         |
| MANI_021015          | 0.83              | 2.33   | 4.40   | NA                                         | NA         |
| MANI_021096          | 6.12              | 4.93   | 0.84   | NA                                         | NA         |
| MANI_029504          | 8.13              | 14.32  | 5.41   | NA                                         | -1.39      |
| MANI_029514          | 0.00              | 0.00   | 0.00   | NA                                         | NA         |
| MANI_021147          | 3.57              | 0.00   | 0.00   | NA                                         | NA         |
| MANI_021114          | 0.00              | 0.00   | 0.00   | NA                                         | NA         |
| MANI_021108          | 0.00              | 0.00   | 0.00   | NA                                         | NA         |
| MANI_021072          | 0.00              | 0.00   | 0.00   | NA                                         | NA         |
| MANI_021085          | 1.73              | 0.70   | 0.00   | NA                                         | NA         |
| MANI_021143          | 0.00              | 0.00   | 0.00   | NA                                         | NA         |
| MANI_021102          | 0.00              | 0.00   | 0.00   | NA                                         | NA         |
| MANI_021077          | 0.00              | 0.00   | 0.00   | NA                                         | NA         |
| MANI_020971          | 0.51              | 0.17   | 0.00   | NA                                         | NA         |

The BGC boundaries were delimited by CASSIS.

Table 10: Expression profiling of the MaNRPS5 cluster.

| NCBI's gene locus ID | Expression (RPKM) | Differential expression (log2-fold change) |
|----------------------|-------------------|--------------------------------------------|
|----------------------|-------------------|--------------------------------------------|

|             | 48hC  | 48hl  | 144hl | 48hCx48hl | 48hlx144hl |
|-------------|-------|-------|-------|-----------|------------|
| MANI_026060 | 5.57  | 1.34  | 10.47 | -1.90     | 2.83       |
| MANI_110048 | 44.93 | 29.69 | 12.25 | NA        | -1.20      |
| MANI_026063 | 0.00  | 0.00  | 0.00  | NA        | NA         |
| MANI_004685 | 0.00  | 0.00  | 0.00  | NA        | NA         |
| MANI_004679 | 12.37 | 0.00  | 0.00  | NA        | NA         |
| MANI_026064 | 5.69  | 1.53  | 1.55  | NA        | NA         |
| MANI_004691 | 6.25  | 0.00  | 1.02  | NA        | NA         |
| MANI_004698 | 4.93  | 14.57 | 0.00  | NA        | NA         |
| MANI_004659 | 0.87  | 0.14  | 0.28  | NA        | NA         |
| MANI_004676 | 2.14  | 17.24 | 1.17  | NA        | NA         |
| MANI_004665 | 0.00  | 0.00  | 0.00  | NA        | NA         |
| MANI_026062 | 0.00  | 0.00  | 0.00  | NA        | NA         |
| MANI_004683 | 0.00  | 0.00  | 0.00  | NA        | NA         |
| MANI_004696 | 0.00  | 0.00  | 0.00  | NA        | NA         |
| MANI_004669 | 0.00  | 0.00  | 0.00  | NA        | NA         |

The BGC boundaries were delimited by CASSIS.

**Table 11: Expression profiling of the MaNRPS6 cluster.**

| NCBI's gene locus ID | Expression (RPKM) |      |       | Differential expression (log <sub>2</sub> -fold change) |            |
|----------------------|-------------------|------|-------|---------------------------------------------------------|------------|
|                      | 48hC              | 48hl | 144hl | 48hCx48hl                                               | 48hlx144hl |
| MANI_004647          | 9.24              | 4.92 | 2.81  | NA                                                      | NA         |
| MANI_026065          | 28.51             | 8.83 | 1.79  | NA                                                      | NA         |

The BGC boundaries were delimited by CASSIS.

**Table 12: Expression profiling of the MaPKS4 cluster.**

| NCBI's gene locus ID | Expression (RPKM) | Differential expression (log <sub>2</sub> -fold change) |
|----------------------|-------------------|---------------------------------------------------------|
|----------------------|-------------------|---------------------------------------------------------|

|             | 48hC  | 48hl  | 144hl | 48hCx48hl | 48hlx144hl |
|-------------|-------|-------|-------|-----------|------------|
| MANI_029451 | 0.00  | 0.00  | 0.00  | NA        | NA         |
| MANI_020788 | 0.00  | 0.00  | 0.00  | NA        | NA         |
| MANI_020787 | 0.00  | 1.14  | 0.00  | NA        | NA         |
| MANI_020781 | 12.56 | 16.04 | 14.53 | NA        | NA         |
| MANI_020786 | 0.00  | 0.00  | 0.00  | NA        | NA         |
| MANI_020789 | 1.84  | 2.96  | 0.00  | NA        | NA         |
| MANI_110051 | 0.23  | 0.09  | 0.19  | NA        | NA         |
| MANI_029463 | 0.00  | 0.41  | 0.00  | NA        | NA         |
| MANI_020891 | 0.00  | 0.00  | 0.00  | NA        | NA         |
| MANI_020915 | 0.00  | 2.12  | 0.72  | NA        | NA         |
| MANI_020808 | 2.70  | 8.25  | 9.71  | NA        | NA         |
| MANI_020807 | 6.01  | 5.25  | 15.16 | NA        | 1.51       |

Table 13: Expression profiling of the MaOTHER3 cluster.

| NCBI's gene locus ID | Expression (RPKM) |      |       | Differential expression (log2-fold change) |            |
|----------------------|-------------------|------|-------|--------------------------------------------|------------|
|                      | 48hC              | 48hl | 144hl | 48hCx48hl                                  | 48hlx144hl |
| MANI_005013          | 0.81              | 0.00 | 0.00  | NA                                         | NA         |
| MANI_005019          | 6.30              | 4.44 | 0.00  | NA                                         | NA         |
| MANI_004943          | 0.00              | 0.00 | 0.00  | NA                                         | NA         |
| MANI_005067          | 21.84             | 0.00 | 0.00  | NA                                         | NA         |
| MANI_004951          | 5.08              | 0.77 | 2.08  | NA                                         | NA         |
| MANI_026138          | 0.71              | 0.00 | 0.00  | NA                                         | NA         |
| MANI_005008          | 0.00              | 0.00 | 0.00  | NA                                         | NA         |
| MANI_004982          | 0.00              | 0.00 | 0.00  | NA                                         | NA         |
| MANI_005015          | 0.00              | 0.00 | 0.00  | NA                                         | NA         |
| MANI_005038          | 0.00              | 0.00 | 0.00  | NA                                         | NA         |
| MANI_005061          | 0.00              | 0.00 | 0.00  | NA                                         | NA         |

Table 14: Expression profiling of the MaTERP2 cluster (Lanosterol cyclase).

| NCBI's gene locus ID | Expression (RPKM) |       |        | Differential expression (log2-fold change) |            |
|----------------------|-------------------|-------|--------|--------------------------------------------|------------|
|                      | 48hC              | 48hl  | 144hl  | 48hCx48hl                                  | 48hlx144hl |
| MANI_025532          | 6.98              | 5.62  | 18.85  | NA                                         | 1.71       |
| MANI_002110          | 27.78             | 65.85 | 123.06 | 1.37                                       | NA         |
| MANI_002183          | 28.69             | 22.06 | 16.01  | NA                                         | NA         |
| MANI_002164          | 4.64              | 14.96 | 4.27   | 1.80                                       | -1.73      |
| MANI_002157          | 86.77             | 55.48 | 61.95  | NA                                         | NA         |
| MANI_002152          | 62.42             | 20.46 | 20.34  | -1.46                                      | NA         |

The BGC boundaries were delimited by CASSIS.

**Table 15: Expression profiling of the MaNRPS-PKS4 cluster.**

| NCBI's gene locus ID | Expression (RPKM) |      |       | Differential expression (log2-fold change) |            |
|----------------------|-------------------|------|-------|--------------------------------------------|------------|
|                      | 48hC              | 48hl | 144hl | 48hCx48hl                                  | 48hlx144hl |
| MANI_022500          | 0.00              | 0.00 | 0.00  | NA                                         | NA         |
| MANI_029817          | 8.86              | 0.59 | 5.44  | NA                                         | NA         |
| MANI_022499          | 0.00              | 0.00 | 1.06  | NA                                         | NA         |
| MANI_022470          | 7.87              | 4.92 | 1.25  | NA                                         | -1.95      |

The BGC boundaries were delimited by CASSIS.

**Table 16: Expression profiling of the MaPKS5 cluster.**

| NCBI's gene locus ID | Expression (RPKM) |      |       | Differential expression (log2-fold change) |            |
|----------------------|-------------------|------|-------|--------------------------------------------|------------|
|                      | 48hC              | 48hl | 144hl | 48hCx48hl                                  | 48hlx144hl |
| MANI_010111          | 0.00              | 0.00 | 0.00  | NA                                         | NA         |
| MANI_010152          | 0.00              | 0.00 | 0.00  | NA                                         | NA         |
| MANI_010132          | 2.88              | 2.32 | 0.79  | NA                                         | NA         |
| MANI_010133          | 0.00              | 0.00 | 0.00  | NA                                         | NA         |



|                    |       |       |       |      |    |
|--------------------|-------|-------|-------|------|----|
| <b>MANI_010116</b> | 0.00  | 0.00  | 0.71  | NA   | NA |
| <b>MANI_010145</b> | 0.00  | 0.00  | 0.00  | NA   | NA |
| <b>MANI_010135</b> | 0.00  | 0.00  | 2.31  | NA   | NA |
| <b>MANI_010096</b> | 0.85  | 16.35 | 18.69 | 4.12 | NA |
| <b>MANI_010114</b> | 14.06 | 16.99 | 18.53 | NA   | NA |
| <b>MANI_027208</b> | 0.28  | 0.23  | 0.00  | NA   | NA |
| <b>MANI_027199</b> | 0.00  | 0.24  | 0.00  | NA   | NA |
| <b>MANI_115496</b> | 0.00  | 0.00  | 0.00  | NA   | NA |
| <b>MANI_010167</b> | 0.00  | 0.00  | 0.00  | NA   | NA |
| <b>MANI_010121</b> | 0.00  | 0.00  | 0.00  | NA   | NA |
| <b>MANI_010120</b> | 0.00  | 0.69  | 2.09  | NA   | NA |
| <b>MANI_010092</b> | 0.00  | 0.00  | 0.00  | NA   | NA |
| <b>MANI_010168</b> | 0.00  | 0.00  | 0.00  | NA   | NA |
| <b>MANI_010063</b> | 0.74  | 0.00  | 0.00  | NA   | NA |
| <b>MANI_010140</b> | 0.00  | 0.00  | 0.00  | NA   | NA |
| <b>MANI_027224</b> | 0.00  | 1.25  | 0.00  | NA   | NA |

**Table 17: Expression profiling of the MaTERP3 cluster.**

| <b>NCBI's gene locus ID</b> | <b>Expression (RPKM)</b> |             |              | <b>Differential expression (log2-fold change)</b> |                   |
|-----------------------------|--------------------------|-------------|--------------|---------------------------------------------------|-------------------|
|                             | <b>48hC</b>              | <b>48hl</b> | <b>144hl</b> | <b>48hCx48hl</b>                                  | <b>48hlx144hl</b> |
| <b>MANI_027210</b>          | 0.00                     | 0.00        | 0.00         | NA                                                | NA                |
| <b>MANI_027216</b>          | 0.00                     | 0.00        | 0.00         | NA                                                | NA                |
| <b>MANI_010143</b>          | 3.46                     | 1.86        | 10.37        | NA                                                | NA                |
| <b>MANI_125771</b>          | 0.00                     | 0.00        | 1.37         | NA                                                | NA                |
| <b>MANI_115504</b>          | 0.00                     | 0.00        | 0.00         | NA                                                | NA                |

**Table 18: Expression profiling of the MaPKS6 cluster.**

| <b>NCBI's gene locus ID</b> | <b>Expression (RPKM)</b> |             |              | <b>Differential expression (log2-fold change)</b> |                   |
|-----------------------------|--------------------------|-------------|--------------|---------------------------------------------------|-------------------|
|                             | <b>48hC</b>              | <b>48hl</b> | <b>144hl</b> | <b>48hCx48hl</b>                                  | <b>48hlx144hl</b> |

|             |      |      |      |    |    |
|-------------|------|------|------|----|----|
| MANI_115504 | 0.00 | 0.00 | 0.00 | NA | NA |
| MANI_010070 | 0.00 | 0.31 | 0.00 | NA | NA |
| MANI_010106 | 0.00 | 0.00 | 0.00 | NA | NA |
| MANI_010080 | 0.00 | 0.00 | 0.52 | NA | NA |
| MANI_027206 | 0.00 | 0.00 | 0.00 | NA | NA |
| MANI_010100 | 0.00 | 0.00 | 0.00 | NA | NA |
| MANI_115518 | 0.00 | 0.00 | 0.00 | NA | NA |
| MANI_010062 | 0.00 | 0.00 | 0.00 | NA | NA |
| MANI_027223 | 0.00 | 0.00 | 0.00 | NA | NA |

Table 19: Expression profiling of the MaPKS7 cluster.

| NCBI's gene locus ID | Expression (RPKM) |       |        | Differential expression (log <sub>2</sub> -fold change) |            |
|----------------------|-------------------|-------|--------|---------------------------------------------------------|------------|
|                      | 48hC              | 48hl  | 144hl  | 48hCx48hl                                               | 48hlx144hl |
| MANI_020133          | 1.32              | 12.52 | 51.84  | 3.33                                                    | 2.00       |
| MANI_115550          | 0.00              | 0.00  | 1.21   | NA                                                      | NA         |
| MANI_020132          | 0.00              | 0.00  | 0.00   | NA                                                      | NA         |
| MANI_020152          | 0.00              | 0.00  | 0.00   | NA                                                      | NA         |
| MANI_020166          | 0.00              | 0.00  | 0.00   | NA                                                      | NA         |
| MANI_020125          | 0.12              | 0.00  | 0.00   | NA                                                      | NA         |
| MANI_020170          | 0.00              | 0.00  | 0.00   | NA                                                      | NA         |
| MANI_029300          | 1.96              | 2.37  | 0.00   | NA                                                      | NA         |
| MANI_020096          | 0.00              | 0.00  | 0.00   | NA                                                      | NA         |
| MANI_115552          | 1.09              | 1.53  | 9.11   | NA                                                      | 2.57       |
| MANI_020099          | 4.06              | 11.77 | 118.42 | NA                                                      | 3.35       |
| MANI_020114          | 0.00              | 1.84  | 0.00   | NA                                                      | NA         |
| MANI_029303          | 0.00              | 0.00  | 0.00   | NA                                                      | NA         |

The BGC boundaries were delimited by CASSIS.

Table 20: Expression profiling of the MaOTHER4 cluster.

| NCBI's gene locus ID | Expression (RPKM) |        |         | Differential expression (log2-fold change) |            |
|----------------------|-------------------|--------|---------|--------------------------------------------|------------|
|                      | 48hC              | 48hl   | 144hl   | 48hCx48hl                                  | 48hlx144hl |
| MANI_019978          | 130.30            | 139.93 | 1338.01 | NA                                         | 3.22       |
| MANI_019961          | 14.31             | 18.73  | 10.98   | NA                                         | NA         |
| MANI_019967          | 3.47              | 2.24   | 10.80   | NA                                         | 2.22       |
| MANI_019956          | 228.68            | 81.62  | 415.42  | -1.35                                      | 2.26       |
| MANI_029277          | 15.97             | 6.27   | 6.70    | -1.23                                      | NA         |
| MANI_029279          | 5.81              | 1.25   | 0.32    | NA                                         | NA         |
| MANI_019946          | 59.12             | 52.64  | 43.27   | NA                                         | NA         |
| MANI_019963          | 66.63             | 32.66  | 58.30   | NA                                         | NA         |
| MANI_019984          | 31.07             | 0.00   | 0.00    | NA                                         | NA         |
| MANI_019966          | 0.80              | 0.00   | 0.00    | NA                                         | NA         |
| MANI_019955          | 19.35             | 26.54  | 9.84    | NA                                         | -1.43      |
| MANI_029283          | 0.00              | 0.00   | 0.00    | NA                                         | NA         |

Table 21: Expression profiling of the MaNRPS7 cluster.

| NCBI's gene locus ID | Expression (RPKM) |       |       | Differential expression (log2-fold change) |            |
|----------------------|-------------------|-------|-------|--------------------------------------------|------------|
|                      | 48hC              | 48hl  | 144hl | 48hCx48hl                                  | 48hlx144hl |
| MANI_027353          | 8.11              | 6.53  | 0.00  | NA                                         | NA         |
| MANI_010645          | 17.79             | 17.30 | 12.08 | NA                                         | NA         |
| MANI_010631          | 6.41              | 20.32 | 12.50 | 1.79                                       | NA         |
| MANI_115821          | 50.55             | 62.04 | 55.14 | NA                                         | NA         |
| MANI_010634          | 33.25             | 36.79 | 55.35 | NA                                         | NA         |
| MANI_010656          | 12.92             | 13.68 | 18.73 | NA                                         | NA         |

The BGC boundaries were delimited by CASSIS.

Table 22: Expression profiling of the MaTERP4 cluster.

| NCBI's gene locus ID | Expression (RPKM) | Differential expression (log2-fold change) |
|----------------------|-------------------|--------------------------------------------|
|----------------------|-------------------|--------------------------------------------|

|             | 48hC  | 48hl  | 144hl | 48hCx48hl | 48hlx144hl |
|-------------|-------|-------|-------|-----------|------------|
| MANI_021634 | 25.52 | 20.56 | 12.53 | NA        | NA         |
| MANI_021633 | 5.19  | 7.32  | 13.81 | NA        | NA         |
| MANI_021625 | 7.97  | 27.80 | 13.03 | 1.93      | -1.05      |
| MANI_116096 | 32.26 | 46.37 | 47.62 | NA        | NA         |
| MANI_021624 | 2.34  | 4.71  | 0.96  | NA        | NA         |
| MANI_021637 | 7.16  | 1.92  | 0.00  | NA        | NA         |

Table 23: Expression profiling of the MaPKS8 cluster (MrPKS2).

| NCBI's gene locus ID | Expression (RPKM) |      |       | Differential expression (log2-fold change) |            |
|----------------------|-------------------|------|-------|--------------------------------------------|------------|
|                      | 48hC              | 48hl | 144hl | 48hCx48hl                                  | 48hlx144hl |
| MANI_028483          | 0.00              | 0.00 | 0.00  | NA                                         | NA         |
| MANI_016007          | 0.00              | 0.00 | 0.00  | NA                                         | NA         |
| MANI_116665          | 0.00              | 1.72 | 0.00  | NA                                         | NA         |
| MANI_016082          | 0.00              | 0.00 | 0.00  | NA                                         | NA         |
| MANI_028434          | 1.24              | 1.22 | 0.22  | NA                                         | NA         |
| MANI_016169          | 0.00              | 2.67 | 0.00  | NA                                         | NA         |
| MANI_016181          | 1.59              | 6.41 | 0.00  | NA                                         | NA         |
| MANI_016065          | 2.32              | 0.00 | 0.00  | NA                                         | NA         |
| MANI_110628          | 0.00              | 2.70 | 0.00  | NA                                         | NA         |
| MANI_016229          | 0.00              | 0.00 | 0.00  | NA                                         | NA         |
| MANI_016226          | 0.00              | 0.00 | 0.00  | NA                                         | NA         |
| MANI_016231          | 0.00              | 0.00 | 0.00  | NA                                         | NA         |

The BGC boundaries were delimited by CASSIS.

Table 24: Expression profiling of the MaOTHER5 cluster.

| NCBI's gene locus ID | Expression (RPKM) |      |       | Differential expression (log2-fold change) |            |
|----------------------|-------------------|------|-------|--------------------------------------------|------------|
|                      | 48hC              | 48hl | 144hl | 48hCx48hl                                  | 48hlx144hl |

|             |        |       |       |       |       |
|-------------|--------|-------|-------|-------|-------|
| MANI_116947 | 236.85 | 15.37 | 9.15  | -3.82 | NA    |
| MANI_018049 | 74.38  | 45.22 | 64.43 | NA    | NA    |
| MANI_028870 | 132.40 | 21.86 | 20.18 | -2.45 | NA    |
| MANI_018046 | 1.25   | 35.29 | 13.83 | 4.82  | -1.34 |
| MANI_018106 | 2.62   | 3.17  | 1.07  | NA    | NA    |
| MANI_028863 | 16.63  | 10.42 | 1.51  | NA    | -2.67 |
| MANI_018104 | 37.83  | 10.60 | 22.88 | -1.66 | 1.13  |
| MANI_018111 | 105.18 | 36.08 | 28.68 | -1.37 | NA    |
| MANI_018053 | 44.82  | 12.58 | 9.44  | -1.71 | NA    |
| MANI_018009 | 52.57  | 17.96 | 34.76 | -1.42 | 1.01  |
| MANI_110662 | 12.83  | 12.72 | 19.38 | NA    | NA    |
| MANI_017975 | 15.21  | 8.31  | 11.11 | NA    | NA    |
| MANI_028845 | 14.53  | 27.80 | 16.35 | NA    | NA    |
| MANI_028842 | 97.33  | 60.97 | 71.89 | NA    | NA    |
| MANI_017970 | 13.37  | 13.08 | 35.16 | NA    | 1.48  |
| MANI_017982 | 21.66  | 7.75  | 23.63 | NA    | 1.58  |
| MANI_017985 | 24.41  | 23.08 | 24.31 | NA    | NA    |

Table 25: Expression profiling of the MaNRPS8 cluster (Metachelin).

| NCBI's gene locus ID | Expression (RPKM) |       |       | Differential expression (log2-fold change) |            |
|----------------------|-------------------|-------|-------|--------------------------------------------|------------|
|                      | 48hC              | 48hI  | 144hI | 48hCx48hI                                  | 48hIx144hI |
| MANI_003049          | 5.59              | 1.72  | 0.54  | -1.55                                      | NA         |
| MANI_003143          | 14.88             | 6.20  | 2.52  | -1.16                                      | NA         |
| MANI_025764          | 3.83              | 0.00  | 0.00  | NA                                         | NA         |
| MANI_003177          | 22.45             | 9.61  | 4.59  | -1.10                                      | -1.06      |
| MANI_003060          | 5.47              | 5.11  | 3.94  | NA                                         | NA         |
| MANI_003059          | 28.13             | 17.17 | 17.20 | NA                                         | NA         |
| MANI_003078          | 12.29             | 16.20 | 15.08 | NA                                         | NA         |
| MANI_003226          | 11.23             | 2.26  | 18.40 | NA                                         | NA         |
| MANI_003103          | 12.66             | 13.78 | 11.22 | NA                                         | NA         |
| MANI_003099          | 16.46             | 31.92 | 34.02 | 1.07                                       | NA         |

The BGC boundaries were delimited by CASSIS.

**Table 26: Expression profiling of the MaNRPS9 cluster (Ferricrocin).**

| NCBI's gene locus ID | Expression (RPKM) |       |       | Differential expression (log2-fold change) |            |
|----------------------|-------------------|-------|-------|--------------------------------------------|------------|
|                      | 48hC              | 48hl  | 144hl | 48hCx48hl                                  | 48hlx144hl |
| <b>MANI_008252</b>   | 5.97              | 1.92  | 0.00  | NA                                         | NA         |
| <b>MANI_127150</b>   | 15.49             | 22.86 | 18.33 | NA                                         | NA         |
| <b>MANI_008246</b>   | 39.97             | 36.56 | 15.34 | NA                                         | -1.22      |
| <b>MANI_117323</b>   | 17.81             | 44.82 | 39.16 | 1.42                                       | NA         |
| <b>MANI_117325</b>   | 10.64             | 28.26 | 21.38 | 1.51                                       | NA         |
| <b>MANI_008248</b>   | 2.57              | 6.21  | 3.36  | NA                                         | NA         |

The BGC boundaries were delimited by CASSIS.

**Table 27: Expression profiling of the MaPKS9 cluster (Viridicatumtoxin).**

| NCBI's gene locus ID | Expression (RPKM) |      |       | Differential expression (log2-fold change) |            |
|----------------------|-------------------|------|-------|--------------------------------------------|------------|
|                      | 48hC              | 48hl | 144hl | 48hCx48hl                                  | 48hlx144hl |
| <b>MANI_003872</b>   | 0.00              | 0.00 | 1.05  | NA                                         | NA         |
| <b>MANI_003860</b>   | 0.00              | 0.00 | 0.00  | NA                                         | NA         |
| <b>MANI_003846</b>   | 3.52              | 3.41 | 2.88  | NA                                         | NA         |
| <b>MANI_003816</b>   | 7.62              | 6.14 | 3.12  | NA                                         | NA         |
| <b>MANI_003811</b>   | 1.21              | 0.00 | 0.33  | NA                                         | NA         |
| <b>MANI_003842</b>   | 0.00              | 0.00 | 0.00  | NA                                         | NA         |
| <b>MANI_003768</b>   | 0.66              | 0.00 | 0.00  | NA                                         | NA         |
| <b>MANI_003787</b>   | 3.60              | 1.45 | 0.00  | NA                                         | NA         |
| <b>MANI_025884</b>   | 2.33              | 4.37 | 3.80  | NA                                         | NA         |
| <b>MANI_003838</b>   | 23.66             | 1.03 | 1.05  | NA                                         | NA         |

The BGC boundaries were delimited by CASSIS.

**Table 28: Expression profiling of the MaNRPS10 cluster.**

| NCBI's gene locus ID | Expression (RPKM) |       |       | Differential expression (log2-fold change) |            |
|----------------------|-------------------|-------|-------|--------------------------------------------|------------|
|                      | 48hC              | 48hl  | 144hl | 48hCx48hl                                  | 48hlx144hl |
| MANI_003979          | 1.00              | 4.01  | 0.00  | NA                                         | NA         |
| MANI_003960          | 7.40              | 2.98  | 0.61  | NA                                         | NA         |
| MANI_003945          | 0.00              | 0.45  | 0.00  | NA                                         | NA         |
| MANI_003902          | 0.17              | 0.87  | 0.34  | NA                                         | NA         |
| MANI_004003          | 0.00              | 0.00  | 0.00  | NA                                         | NA         |
| MANI_003995          | 0.00              | 1.43  | 0.00  | NA                                         | NA         |
| MANI_003990          | 0.00              | 52.01 | 5.98  | 7.65                                       | -3.02      |
| MANI_003985          | 0.00              | 0.00  | 0.00  | NA                                         | NA         |
| MANI_003934          | 0.70              | 0.57  | 0.00  | NA                                         | NA         |

The BGC boundaries were delimited by CASSIS.

**Table 29: Expression profiling of the MaPKS10 cluster.**

| NCBI's gene locus ID | Expression (RPKM) |       |       | Differential expression (log2-fold change) |            |
|----------------------|-------------------|-------|-------|--------------------------------------------|------------|
|                      | 48hC              | 48hl  | 144hl | 48hCx48hl                                  | 48hlx144hl |
| MANI_019165          | 299.73            | 28.05 | 6.75  | -3.31                                      | -1.98      |
| MANI_019170          | 231.24            | 21.04 | 8.71  | -3.34                                      | -1.24      |
| MANI_019155          | 262.76            | 22.90 | 8.86  | -3.52                                      | -1.34      |
| MANI_019168          | 430.71            | 96.96 | 32.83 | -2.12                                      | -1.49      |

The BGC boundaries were delimited by CASSIS.

**Table 30: Expression profiling of the MaOTHER6 cluster.**

| NCBI's gene locus ID | Expression (RPKM) | Differential expression (log2-fold change) |
|----------------------|-------------------|--------------------------------------------|
|----------------------|-------------------|--------------------------------------------|

|             | 48hC   | 48hl   | 144hl  | 48hCx48hl | 48hlx144hl |
|-------------|--------|--------|--------|-----------|------------|
| MANI_127795 | 0.00   | 32.13  | 143.38 | NA        | 2.15       |
| MANI_006107 | 47.10  | 38.84  | 70.65  | NA        | NA         |
| MANI_006104 | 3.96   | 1.60   | 0.81   | NA        | NA         |
| MANI_006102 | 8.04   | 0.00   | 1.20   | NA        | NA         |
| MANI_110861 | 2.65   | 3.56   | 1.45   | NA        | NA         |
| MANI_117972 | 9.17   | 8.72   | 8.86   | NA        | NA         |
| MANI_006066 | 2.22   | 12.50  | 9.98   | NA        | NA         |
| MANI_006043 | 55.72  | 11.33  | 6.91   | -2.17     | NA         |
| MANI_006072 | 10.62  | 62.02  | 11.95  | 2.62      | -2.31      |
| MANI_127783 | 5.46   | 5.49   | 4.47   | NA        | NA         |
| MANI_026371 | 7.27   | 6.51   | 3.97   | NA        | NA         |
| MANI_006080 | 0.00   | 0.00   | 0.00   | NA        | NA         |
| MANI_026382 | 372.43 | 218.58 | 42.29  | NA        | -2.40      |
| MANI_026375 | 6.64   | 14.97  | 9.23   | 1.26      | NA         |

Table 31: Expression profiling of the MaOTHER7 cluster.

| NCBI's gene locus ID | Expression (RPKM) |      |       | Differential expression (log2-fold change) |            |
|----------------------|-------------------|------|-------|--------------------------------------------|------------|
|                      | 48hC              | 48hl | 144hl | 48hCx48hl                                  | 48hlx144hl |
| MANI_000880          | 0.00              | 0.00 | 0.00  | NA                                         | NA         |
| MANI_118212          | 0.00              | 0.00 | 0.00  | NA                                         | NA         |
| MANI_000883          | 7.91              | 4.25 | 3.59  | NA                                         | NA         |
| MANI_025256          | 9.30              | 2.50 | 5.07  | NA                                         | NA         |
| MANI_000863          | 5.37              | 1.44 | 0.73  | NA                                         | NA         |
| MANI_000865          | 0.32              | 0.00 | 0.00  | NA                                         | NA         |

The BGC boundaries were delimited by CASSIS.

Table 32: Expression profiling of the MaOTHER8 cluster.

| NCBI's gene locus ID | Expression (RPKM) | Differential expression (log2-fold |
|----------------------|-------------------|------------------------------------|
|----------------------|-------------------|------------------------------------|



|                    |         |        |        | change)   |            |
|--------------------|---------|--------|--------|-----------|------------|
|                    | 48hC    | 48hl   | 144hl  | 48hCx48hl | 48hlx144hl |
| <b>MANI_000878</b> | 1012.15 | 626.02 | 73.40  | NA        | -3.14      |
| <b>MANI_110901</b> | 11.64   | 136.93 | 74.57  | 3.63      | NA         |
| <b>MANI_000858</b> | 12.25   | 54.27  | 24.50  | 2.26      | -1.13      |
| <b>MANI_000852</b> | 0.00    | 207.98 | 129.69 | 10.09     | NA         |
| <b>MANI_118224</b> | 9.55    | 204.61 | 60.95  | 4.50      | -1.78      |
| <b>MANI_000859</b> | 8.82    | 278.69 | 146.05 | 5.09      | -1.00      |
| <b>MANI_000861</b> | 6.11    | 180.78 | 190.77 | 4.96      | NA         |

The BGC boundaries were delimited by CASSIS.

**Table 33: Expression profiling of the MaTERP-PKS1 cluster.**

| NCBI's gene locus ID | Expression (RPKM) |       |       | Differential expression (log2-fold change) |            |
|----------------------|-------------------|-------|-------|--------------------------------------------|------------|
|                      | 48hC              | 48hl  | 144hl | 48hCx48hl                                  | 48hlx144hl |
| <b>MANI_118227</b>   | 0.00              | 0.00  | 0.00  | NA                                         | NA         |
| <b>MANI_026441</b>   | 1.02              | 23.73 | 0.83  | NA                                         | NA         |
| <b>MANI_006343</b>   | 0.00              | 0.00  | 0.00  | NA                                         | NA         |
| <b>MANI_127977</b>   | 0.00              | 0.00  | 0.00  | NA                                         | NA         |
| <b>MANI_006355</b>   | 0.00              | 0.00  | 1.46  | NA                                         | NA         |
| <b>MANI_006367</b>   | 1.21              | 0.00  | 0.00  | NA                                         | NA         |
| <b>MANI_006324</b>   | 0.00              | 0.22  | 0.00  | NA                                         | NA         |
| <b>MANI_006356</b>   | 0.00              | 0.00  | 0.00  | NA                                         | NA         |
| <b>MANI_006353</b>   | 0.00              | 0.00  | 0.00  | NA                                         | NA         |

The BGC boundaries were delimited by CASSIS.

**Table 34: Expression profiling of the MaPKS11 cluster.**

| NCBI's gene locus ID | Expression (RPKM) | Differential expression (log2-fold change) |
|----------------------|-------------------|--------------------------------------------|
|----------------------|-------------------|--------------------------------------------|

|                    | <b>48hC</b>  | <b>48hl</b> | <b>144hl</b> | <b>48hCx48hl</b> | <b>48hlx144hl</b> |
|--------------------|--------------|-------------|--------------|------------------|-------------------|
| <b>MANI_006805</b> | <b>13.56</b> | <b>6.95</b> | <b>7.07</b>  | NA               | NA                |
| <b>MANI_006801</b> | 17.98        | 12.35       | 9.08         | NA               | NA                |
| <b>MANI_006859</b> | 15.96        | 18.56       | 26.11        | NA               | NA                |
| <b>MANI_006835</b> | 32.66        | 26.31       | 18.96        | NA               | NA                |
| <b>MANI_006858</b> | 43.49        | 28.29       | 67.06        | NA               | 1.26              |
| <b>MANI_026542</b> | 0.00         | 0.00        | 0.00         | NA               | NA                |
| <b>MANI_006811</b> | 0.00         | 0.55        | 0.00         | NA               | NA                |
| <b>MANI_006808</b> | 0.00         | 0.00        | 0.00         | NA               | NA                |
| <b>MANI_006856</b> | 0.00         | 0.00        | 0.00         | NA               | NA                |
| <b>MANI_006827</b> | 0.00         | 0.00        | 0.00         | NA               | NA                |
| <b>MANI_006783</b> | 0.93         | 0.37        | 0.00         | NA               | NA                |
| <b>MANI_006831</b> | 0.00         | 0.00        | 0.00         | NA               | NA                |
| <b>MANI_006795</b> | 0.79         | 0.63        | 0.00         | NA               | NA                |
| <b>MANI_006836</b> | 0.00         | 0.00        | 0.00         | NA               | NA                |
| <b>MANI_118628</b> | 1.60         | 1.72        | 1.31         | NA               | NA                |
| <b>MANI_006798</b> | 1.75         | 4.69        | 4.77         | NA               | NA                |

The BGC boundaries were delimited by CASSIS.

**Table 35: Expression profiling of the MaPKS12 cluster.**

| <b>NCBI's gene locus ID</b> | <b>Expression (RPKM)</b> |             |              | <b>Differential expression (log2-fold change)</b> |                   |
|-----------------------------|--------------------------|-------------|--------------|---------------------------------------------------|-------------------|
|                             | <b>48hC</b>              | <b>48hl</b> | <b>144hl</b> | <b>48hCx48hl</b>                                  | <b>48hlx144hl</b> |
| <b>MANI_002711</b>          | 0.00                     | 0.51        | 0.00         | NA                                                | NA                |
| <b>MANI_002718</b>          | 1.15                     | 0.00        | 0.00         | NA                                                | NA                |
| <b>MANI_002715</b>          | 0.91                     | 0.73        | 0.00         | NA                                                | NA                |
| <b>MANI_002710</b>          | 1.58                     | 0.85        | 2.16         | NA                                                | NA                |
| <b>MANI_110978</b>          | 0.12                     | 0.00        | 0.10         | NA                                                | NA                |

The BGC boundaries were delimited by CASSIS.

**Table 36: Expression profiling of the MaTERP5 cluster (GGPP synthase).**

| NCBI's gene locus ID | Expression (RPKM) |       |       | Differential expression (log2-fold change) |            |
|----------------------|-------------------|-------|-------|--------------------------------------------|------------|
|                      | 48hC              | 48hl  | 144hl | 48hCx48hl                                  | 48hlx144hl |
| <b>MANI_024154</b>   | 56.33             | 19.06 | 14.72 | -1.42                                      | NA         |
| <b>MANI_024125</b>   | 30.14             | 45.84 | 60.37 | NA                                         | NA         |
| <b>MANI_024126</b>   | 45.84             | 32.23 | 36.97 | NA                                         | NA         |
| <b>MANI_024161</b>   | 42.10             | 33.90 | 31.26 | NA                                         | NA         |
| <b>MANI_030188</b>   | 3.93              | 3.54  | 5.12  | NA                                         | NA         |
| <b>MANI_030184</b>   | 0.48              | 0.39  | 1.57  | NA                                         | NA         |
| <b>MANI_118863</b>   | 13.35             | 13.35 | 15.50 | NA                                         | NA         |
| <b>MANI_024131</b>   | 19.90             | 29.06 | 41.22 | NA                                         | NA         |
| <b>MANI_024139</b>   | 12.34             | 9.94  | 19.06 | NA                                         | NA         |
| <b>MANI_024162</b>   | 6.06              | 1.63  | 0.00  | NA                                         | NA         |

The BGC boundaries were delimited by CASSIS.

**Table 37: Expression profiling of the MaOTHER9 cluster.**

| NCBI's gene locus ID | Expression (RPKM) |       |       | Differential expression (log2-fold change) |            |
|----------------------|-------------------|-------|-------|--------------------------------------------|------------|
|                      | 48hC              | 48hl  | 144hl | 48hCx48hl                                  | 48hlx144hl |
| <b>MANI_024160</b>   | 0.00              | 0.00  | 0.00  | NA                                         | NA         |
| <b>MANI_024071</b>   | 0.00              | 0.22  | 0.00  | NA                                         | NA         |
| <b>MANI_024095</b>   | 5.57              | 0.37  | 0.38  | NA                                         | NA         |
| <b>MANI_024163</b>   | 19.00             | 13.70 | 4.09  | NA                                         | NA         |

The BGC boundaries were delimited by CASSIS.

**Table 38: Expression profiling of the MaNRPS11 cluster.**

| NCBI's gene locus ID | Expression (RPKM) | Differential expression (log2-fold change) |
|----------------------|-------------------|--------------------------------------------|
|----------------------|-------------------|--------------------------------------------|

|             | 48hC  | 48hl  | 144hl | 48hCx48hl | 48hlx144hl |
|-------------|-------|-------|-------|-----------|------------|
| MANI_006972 | 0.00  | 3.22  | 0.00  | NA        | NA         |
| MANI_006947 | 10.67 | 7.60  | 1.95  | NA        | -1.97      |
| MANI_006962 | 13.24 | 19.43 | 23.60 | NA        | NA         |
| MANI_006985 | 14.84 | 15.21 | 32.00 | NA        | 1.08       |
| MANI_026573 | 6.23  | 4.02  | 0.00  | NA        | NA         |
| MANI_006959 | 60.29 | 41.06 | 51.73 | NA        | NA         |
| MANI_006969 | 11.71 | 3.14  | 1.60  | NA        | NA         |
| MANI_118897 | 8.95  | 5.90  | 14.01 | NA        | 1.31       |

The BGC boundaries were delimited by CASSIS.

Table 39: Expression profiling of the MaNRPS-PKS5 cluster.

| NCBI's gene locus ID | Expression (RPKM) |      |       | Differential expression (log2-fold change) |            |
|----------------------|-------------------|------|-------|--------------------------------------------|------------|
|                      | 48hC              | 48hl | 144hl | 48hCx48hl                                  | 48hlx144hl |
| MANI_006242          | 2.06              | 0.00 | 0.00  | NA                                         | NA         |
| MANI_128792          | 0.00              | 0.00 | 0.00  | NA                                         | NA         |
| MANI_006238          | 4.25              | 0.00 | 0.00  | NA                                         | NA         |
| MANI_006214          | 2.36              | 0.95 | 0.00  | NA                                         | NA         |
| MANI_026405          | 6.57              | 4.91 | 1.54  | NA                                         | NA         |
| MANI_006237          | 9.55              | 0.00 | 0.00  | NA                                         | NA         |
| MANI_006185          | 1.88              | 1.21 | 0.31  | NA                                         | NA         |
| MANI_006236          | 5.57              | 0.00 | 0.00  | NA                                         | NA         |
| MANI_006158          | 0.16              | 0.00 | 0.00  | NA                                         | NA         |
| MANI_006235          | 0.00              | 0.00 | 0.00  | NA                                         | NA         |
| MANI_006219          | 3.16              | 0.00 | 0.00  | NA                                         | NA         |
| MANI_026410          | 0.00              | 0.00 | 0.00  | NA                                         | NA         |
| MANI_026395          | 0.12              | 0.00 | 0.00  | NA                                         | NA         |

Table 40: Expression profiling of the MaNRPS12 cluster.

| NCBI's gene locus ID | Expression (RPKM) |       |       | Differential expression (log2-fold change) |            |
|----------------------|-------------------|-------|-------|--------------------------------------------|------------|
|                      | 48hC              | 48hl  | 144hl | 48hCx48hl                                  | 48hlx144hl |
| MANI_006235          | 0.00              | 0.00  | 0.00  | NA                                         | NA         |
| MANI_006219          | 3.14              | 0.00  | 0.00  | NA                                         | NA         |
| MANI_026410          | 0.00              | 0.00  | 0.00  | NA                                         | NA         |
| MANI_026395          | 0.12              | 0.00  | 0.00  | NA                                         | NA         |
| MANI_006234          | 0.00              | 0.00  | 0.00  | NA                                         | NA         |
| MANI_026399          | 0.40              | 0.16  | 0.33  | NA                                         | NA         |
| MANI_006155          | 0.38              | 0.04  | 0.04  | NA                                         | NA         |
| MANI_006174          | 19.31             | 31.10 | 33.75 | NA                                         | NA         |
| MANI_006224          | 2.22              | 2.98  | 2.42  | NA                                         | NA         |
| MANI_006172          | 0.37              | 0.00  | 0.00  | NA                                         | NA         |
| MANI_119390          | 0.00              | 0.46  | 0.00  | NA                                         | NA         |
| MANI_006208          | 11.80             | 0.79  | 0.00  | NA                                         | NA         |

The BGC boundaries were delimited by CASSIS.

**Table 41: Expression profiling of the MaPKS13 cluster.**

| NCBI's gene locus ID | Expression (RPKM) |       |       | Differential expression (log2-fold change) |            |
|----------------------|-------------------|-------|-------|--------------------------------------------|------------|
|                      | 48hC              | 48hl  | 144hl | 48hCx48hl                                  | 48hlx144hl |
| MANI_006263          | 0.00              | 0.00  | 0.00  | NA                                         | NA         |
| MANI_006262          | 21.65             | 6.60  | 4.31  | -1.56                                      | NA         |
| MANI_006250          | 17.29             | 13.39 | 8.52  | NA                                         | NA         |
| MANI_006260          | 15.58             | 14.53 | 6.04  | NA                                         | -1.22      |
| MANI_006261          | 77.75             | 3.89  | 1.80  | -4.20                                      | NA         |
| MANI_111163          | 68.91             | 73.35 | 79.32 | NA                                         | NA         |

The BGC boundaries were delimited by CASSIS.

**Table 42: Expression profiling of the MaIND-TERP1 cluster (Terpendole E/lolitrein-related compound).**

| NCBI's gene locus ID | Expression (RPKM) |      |       | Differential expression (log2-fold change) |            |
|----------------------|-------------------|------|-------|--------------------------------------------|------------|
|                      | 48hC              | 48hl | 144hl | 48hCx48hl                                  | 48hlx144hl |
| MANI_027395          | 1.49              | 6.01 | 8.54  | NA                                         | NA         |
| MANI_027395          | 1.49              | 6.01 | 8.54  | NA                                         | NA         |
| MANI_111286          | 0.00              | 7.49 | 1.38  | NA                                         | NA         |
| MANI_027412          | 0.00              | 0.00 | 0.00  | NA                                         | NA         |
| MANI_027413          | 0.00              | 0.00 | 0.00  | NA                                         | NA         |
| MANI_119883          | 1.37              | 2.21 | 13.49 | NA                                         | 2.60       |
| MANI_011022          | 0.00              | 0.00 | 0.00  | NA                                         | NA         |
| MANI_011010          | 0.00              | 0.00 | 0.74  | NA                                         | NA         |
| MANI_011011          | 0.00              | 0.00 | 0.00  | NA                                         | NA         |
| MANI_011024          | 0.87              | 0.00 | 0.00  | NA                                         | NA         |
| MANI_119895          | 0.00              | 0.00 | 0.00  | NA                                         | NA         |
| MANI_011015          | 0.00              | 0.00 | 0.56  | NA                                         | NA         |
| MANI_027409          | 0.00              | 0.00 | 0.00  | NA                                         | NA         |
| MANI_011023          | 0.00              | 1.23 | 0.62  | NA                                         | NA         |

Table 43: Expression profiling of the MaNRPS13 cluster.

| NCBI's gene locus ID | Expression (RPKM) |       |       | Differential expression (log2-fold change) |            |
|----------------------|-------------------|-------|-------|--------------------------------------------|------------|
|                      | 48hC              | 48hl  | 144hl | 48hCx48hl                                  | 48hlx144hl |
| MANI_008887          | 87.51             | 40.93 | 72.24 | NA                                         | NA         |
| MANI_008916          | 34.75             | 12.44 | 14.76 | -1.29                                      | NA         |
| MANI_008932          | 50.81             | 57.28 | 47.19 | NA                                         | NA         |
| MANI_008883          | 3.06              | 3.95  | 5.01  | NA                                         | NA         |
| MANI_026956          | 23.71             | 37.62 | 34.69 | NA                                         | NA         |
| MANI_026948          | 0.37              | 1.20  | 1.22  | NA                                         | NA         |
| MANI_008854          | 0.00              | 4.49  | 0.00  | NA                                         | NA         |
| MANI_008852          | 0.86              | 0.00  | 0.00  | NA                                         | NA         |
| MANI_008843          | 0.15              | 0.00  | 0.00  | NA                                         | NA         |
| MANI_008835          | 0.00              | 0.00  | 0.00  | NA                                         | NA         |

|                    |      |      |      |    |    |
|--------------------|------|------|------|----|----|
| <b>MANI_008820</b> | 3.25 | 5.57 | 1.00 | NA | NA |
|--------------------|------|------|------|----|----|

The BGC boundaries were delimited by CASSIS.

**Table 44: Expression profiling of the MaPKS14 cluster.**

| NCBI's gene locus ID | Expression (RPKM) |      |       | Differential expression (log2-fold change) |            |
|----------------------|-------------------|------|-------|--------------------------------------------|------------|
|                      | 48hC              | 48hl | 144hl | 48hCx48hl                                  | 48hlx144hl |
| <b>MANI_018961</b>   | 0.00              | 6.48 | 0.00  | NA                                         | NA         |
| <b>MANI_029060</b>   | 0.92              | 0.74 | 0.75  | NA                                         | NA         |
| <b>MANI_018925</b>   | 0.00              | 1.95 | 0.49  | NA                                         | NA         |
| <b>MANI_018949</b>   | 0.99              | 7.15 | 1.61  | NA                                         | NA         |
| <b>MANI_018915</b>   | 0.51              | 7.81 | 7.93  | NA                                         | NA         |
| <b>MANI_018966</b>   | 2.15              | 6.91 | 3.51  | NA                                         | NA         |
| <b>MANI_018879</b>   | 2.82              | 6.81 | 2.58  | 1.42                                       | -1.37      |

**Table 45: Expression profiling of the MaIND-NRPS1 cluster (Elymoclavine/ergovaline-related compound).**

| NCBI's gene locus ID | Expression (RPKM) |      |       | Differential expression (log2-fold change) |            |
|----------------------|-------------------|------|-------|--------------------------------------------|------------|
|                      | 48hC              | 48hl | 144hl | 48hCx48hl                                  | 48hlx144hl |
| <b>MANI_021859</b>   | 0.00              | 0.00 | 0.00  | NA                                         | NA         |
| <b>MANI_029655</b>   | 0.00              | 0.00 | 0.00  | NA                                         | NA         |
| <b>MANI_021853</b>   | 0.00              | 0.00 | 0.00  | NA                                         | NA         |
| <b>MANI_029666</b>   | 0.00              | 0.00 | 0.00  | NA                                         | NA         |
| <b>MANI_029677</b>   | 0.00              | 0.00 | 0.00  | NA                                         | NA         |
| <b>MANI_021832</b>   | 2.48              | 0.50 | 0.51  | NA                                         | NA         |
| <b>MANI_021880</b>   | 0.00              | 0.00 | 0.00  | NA                                         | NA         |
| <b>MANI_120630</b>   | 0.39              | 1.26 | 0.00  | NA                                         | NA         |

The BGC boundaries were delimited by CASSIS.

**Table 46: Expression profiling of the MaOTHER10 cluster.**

| NCBI's gene locus ID | Expression (RPKM) |        |        | Differential expression (log2-fold change) |            |
|----------------------|-------------------|--------|--------|--------------------------------------------|------------|
|                      | 48hC              | 48hl   | 144hl  | 48hCx48hl                                  | 48hlx144hl |
| MANI_011655          | 7.77              | 6.57   | 10.81  | NA                                         | NA         |
| MANI_011669          | 10.08             | 13.19  | 5.15   | NA                                         | -1.33      |
| MANI_011674          | 6.85              | 1.38   | 0.70   | NA                                         | NA         |
| MANI_011690          | 0.00              | 112.28 | 107.00 | 8.53                                       | NA         |
| MANI_011679          | 1.18              | 1.43   | 19.78  | NA                                         | 3.68       |
| MANI_011680          | 5.09              | 8.72   | 59.38  | NA                                         | 2.75       |
| MANI_011687          | 14.26             | 58.09  | 22.64  | 2.14                                       | -1.32      |
| MANI_011653          | 0.00              | 0.00   | 0.00   | NA                                         | NA         |

Table 47: Expression profiling of the MaPKS15 cluster.

| NCBI's gene locus ID | Expression (RPKM) |         |       | Differential expression (log2-fold change) |            |
|----------------------|-------------------|---------|-------|--------------------------------------------|------------|
|                      | 48hC              | 48hl    | 144hl | 48hCx48hl                                  | 48hlx144hl |
| MANI_021560          | 6.78              | 4.96    | 19.70 | NA                                         | 1.93       |
| MANI_021544          | 0.00              | 3.49    | 0.00  | NA                                         | NA         |
| MANI_021563          | 16.13             | 1022.48 | 19.79 | 6.09                                       | -5.64      |
| MANI_021550          | 6.02              | 16.57   | 44.34 | 1.58                                       | 1.42       |
| MANI_021547          | 2.17              | 10.06   | 12.00 | 2.27                                       | NA         |
| MANI_021569          | 1.26              | 1.01    | 1.03  | NA                                         | NA         |
| MANI_021559          | 0.60              | 2.92    | 0.00  | NA                                         | NA         |
| MANI_029610          | 0.73              | 0.00    | 1.80  | NA                                         | NA         |
| MANI_021580          | 0.00              | 0.00    | 0.00  | NA                                         | NA         |
| MANI_021529          | 0.98              | 0.79    | 0.20  | NA                                         | NA         |

The BGC boundaries were delimited by CASSIS.

Table 48: Expression profiling of the MaPKS16 cluster.

| NCBI's gene locus ID | Expression (RPKM) | Differential expression (log2-fold change) |
|----------------------|-------------------|--------------------------------------------|
|----------------------|-------------------|--------------------------------------------|



|             | 48hC | 48hl | 144hl | 48hCx48hl | 48hlx144hl |
|-------------|------|------|-------|-----------|------------|
| MANI_020896 | 0.00 | 0.00 | 0.00  | NA        | NA         |
| MANI_029455 | 0.24 | 0.19 | 0.00  | NA        | NA         |
| MANI_020910 | 0.00 | 0.00 | 0.00  | NA        | NA         |
| MANI_020904 | 0.00 | 0.00 | 0.00  | NA        | NA         |
| MANI_121029 | 0.00 | 0.57 | 0.58  | NA        | NA         |
| MANI_020797 | 0.00 | 0.00 | 0.00  | NA        | NA         |

The BGC boundaries were delimited by CASSIS.

**Table 49: Expression profiling of the MaOTHER11 cluster.**

| NCBI's gene locus ID | Expression (RPKM) |       |       | Differential expression (log2-fold change) |            |
|----------------------|-------------------|-------|-------|--------------------------------------------|------------|
|                      | 48hC              | 48hl  | 144hl | 48hCx48hl                                  | 48hlx144hl |
| MANI_121318          | 32.80             | 17.12 | 10.18 | NA                                         | NA         |
| MANI_007223          | 10.35             | 18.63 | 17.43 | NA                                         | NA         |
| MANI_007317          | 19.62             | 6.70  | 16.05 | -1.36                                      | 1.25       |
| MANI_121326          | 60.49             | 25.00 | 29.63 | -1.15                                      | NA         |
| MANI_026683          | 157.67            | 74.92 | 48.26 | NA                                         | NA         |
| MANI_111648          | 86.50             | 52.01 | 42.86 | NA                                         | NA         |
| MANI_026624          | 12.59             | 3.59  | 3.49  | -1.68                                      | NA         |
| MANI_007232          | 41.21             | 26.04 | 26.71 | NA                                         | NA         |
| MANI_121338          | 46.45             | 14.76 | 12.15 | -1.53                                      | NA         |
| MANI_121345          | 22.65             | 16.91 | 46.09 | NA                                         | 1.49       |
| MANI_136963          | 22.73             | 12.20 | 12.42 | NA                                         | NA         |
| MANI_007164          | 17.88             | 26.56 | 25.27 | NA                                         | NA         |
| MANI_130057          | 39.08             | 15.38 | 12.52 | -1.24                                      | NA         |

**Table 50: Expression profiling of the MaNRPS-PKS7 cluster.**

| NCBI's gene locus ID | Expression (RPKM) | Differential expression (log2-fold change) |
|----------------------|-------------------|--------------------------------------------|
|----------------------|-------------------|--------------------------------------------|

|                    | 48hC | 48hl | 144hl | 48hCx48hl | 48hlx144hl |
|--------------------|------|------|-------|-----------|------------|
| <b>MANI_002005</b> | 0.00 | 0.00 | 0.00  | NA        | NA         |
| <b>MANI_001951</b> | 0.22 | 0.17 | 0.71  | NA        | NA         |
| <b>MANI_001950</b> | 0.00 | 0.16 | 0.00  | NA        | NA         |
| <b>MANI_121458</b> | 0.00 | 0.00 | 0.00  | NA        | NA         |

The BGC boundaries were delimited by CASSIS.

**Table 51: Expression profiling of the MaPKS17 cluster.**

| NCBI's gene locus ID | Expression (RPKM) |       |       | Differential expression (log2-fold change) |            |
|----------------------|-------------------|-------|-------|--------------------------------------------|------------|
|                      | 48hC              | 48hl  | 144hl | 48hCx48hl                                  | 48hlx144hl |
| <b>MANI_002833</b>   | 0.00              | 0.00  | 0.00  | NA                                         | NA         |
| <b>MANI_002790</b>   | 0.00              | 0.00  | 0.00  | NA                                         | NA         |
| <b>MANI_002789</b>   | 13.10             | 5.63  | 10.00 | NA                                         | NA         |
| <b>MANI_002808</b>   | 0.00              | 3.00  | 1.52  | NA                                         | NA         |
| <b>MANI_025650</b>   | 1.54              | 5.05  | 1.58  | 1.75                                       | -1.55      |
| <b>MANI_002819</b>   | 0.80              | 13.61 | 2.63  | NA                                         | NA         |
| <b>MANI_002768</b>   | 1.37              | 23.87 | 9.65  | 4.22                                       | -1.32      |
| <b>MANI_002813</b>   | 0.84              | 0.67  | 0.00  | NA                                         | NA         |
| <b>MANI_002850</b>   | 2.43              | 1.95  | 0.00  | NA                                         | NA         |
| <b>MANI_002828</b>   | 0.00              | 0.00  | 0.00  | NA                                         | NA         |

The BGC boundaries were delimited by CASSIS.

**Table 52: Expression profiling of the MaOTHER12 cluster.**

| NCBI's gene locus ID | Expression (RPKM) |        |        | Differential expression (log2-fold change) |            |
|----------------------|-------------------|--------|--------|--------------------------------------------|------------|
|                      | 48hC              | 48hl   | 144hl  | 48hCx48hl                                  | 48hlx144hl |
| <b>MANI_010565</b>   | 0.00              | 0.00   | 0.00   | NA                                         | NA         |
| <b>MANI_010519</b>   | 83.27             | 258.33 | 140.03 | 1.75                                       | NA         |

|                    |      |       |       |      |       |
|--------------------|------|-------|-------|------|-------|
| <b>MANI_010516</b> | 0.00 | 11.80 | 1.89  | NA   | NA    |
| <b>MANI_010482</b> | 0.59 | 8.37  | 2.43  | 3.81 | -1.74 |
| <b>MANI_010462</b> | 1.05 | 16.85 | 3.42  | NA   | NA    |
| <b>MANI_010460</b> | 0.00 | 2.70  | 0.00  | NA   | NA    |
| <b>MANI_010583</b> | 1.91 | 65.38 | 35.94 | 5.09 | NA    |
| <b>MANI_027314</b> | 0.54 | 6.06  | 3.08  | NA   | NA    |
| <b>MANI_010548</b> | 0.78 | 69.21 | 56.88 | 6.31 | NA    |
| <b>MANI_027320</b> | 0.00 | 21.77 | 7.04  | 7.38 | -1.66 |

The BGC boundaries were delimited by CASSIS.

**Table 53: Expression profiling of the MaPKS18 cluster.**

| NCBI's gene locus ID | Expression (RPKM) |         |        | Differential expression (log <sub>2</sub> -fold change) |            |
|----------------------|-------------------|---------|--------|---------------------------------------------------------|------------|
|                      | 48hC              | 48hl    | 144hl  | 48hCx48hl                                               | 48hlx144hl |
| <b>MANI_027325</b>   | 279.12            | 15.82   | 12.19  | -4.04                                                   | NA         |
| <b>MANI_010559</b>   | 0.00              | 0.00    | 0.00   | NA                                                      | NA         |
| <b>MANI_010451</b>   | 2.14              | 296.21  | 8.90   | 7.21                                                    | -5.01      |
| <b>MANI_010561</b>   | 7.70              | 427.29  | 28.00  | 5.90                                                    | -3.98      |
| <b>MANI_027340</b>   | 1.85              | 44.71   | 0.00   | 4.43                                                    | -6.89      |
| <b>MANI_010595</b>   | 5.59              | 243.85  | 4.57   | 5.52                                                    | -5.65      |
| <b>MANI_010577</b>   | 0.91              | 237.72  | 14.91  | 7.86                                                    | -3.95      |
| <b>MANI_010494</b>   | 5.23              | 394.22  | 2.44   | 6.35                                                    | -7.27      |
| <b>MANI_010469</b>   | 0.00              | 35.23   | 1.38   | 8.20                                                    | -4.52      |
| <b>MANI_027305</b>   | 0.00              | 60.56   | 6.04   | 8.75                                                    | -3.32      |
| <b>MANI_121654</b>   | 0.83              | 105.53  | 15.61  | 6.85                                                    | -2.78      |
| <b>MANI_010508</b>   | 2.57              | 456.62  | 2.10   | 7.54                                                    | -7.67      |
| <b>MANI_010524</b>   | 0.65              | 216.07  | 1.59   | 8.20                                                    | -6.92      |
| <b>MANI_010603</b>   | 7.89              | 1844.05 | 101.19 | 7.94                                                    | -4.13      |
| <b>MANI_121656</b>   | 0.00              | 179.64  | 3.23   | 8.75                                                    | -5.62      |

The BGC boundaries were delimited by CASSIS.

**Table 54: Expression profiling of the MaNRPS-PKS6 cluster.**

| NCBI's gene locus ID | Expression (RPKM) |      |       | Differential expression (log2-fold change) |            |
|----------------------|-------------------|------|-------|--------------------------------------------|------------|
|                      | 48hC              | 48hl | 144hl | 48hCx48hl                                  | 48hlx144hl |
| MANI_010576          | 0.00              | 0.72 | 0.00  | NA                                         | NA         |
| MANI_010456          | 0.00              | 0.00 | 0.00  | NA                                         | NA         |
| MANI_121659          | 0.00              | 0.00 | 0.00  | NA                                         | NA         |

The BGC boundaries were delimited by CASSIS.

**Table 55: Expression profiling of the MaPKS19 cluster.**

| NCBI's gene locus ID | Expression (RPKM) |       |       | Differential expression (log2-fold change) |            |
|----------------------|-------------------|-------|-------|--------------------------------------------|------------|
|                      | 48hC              | 48hl  | 144hl | 48hCx48hl                                  | 48hlx144hl |
| MANI_012057          | 32.23             | 35.24 | 28.70 | NA                                         | NA         |
| MANI_012116          | 35.65             | 16.36 | 21.78 | NA                                         | NA         |
| MANI_012094          | 24.60             | 6.60  | 26.09 | -1.74                                      | 2.01       |
| MANI_012096          | 25.33             | 16.58 | 66.06 | NA                                         | 1.85       |
| MANI_012206          | 2.03              | 4.08  | 5.81  | NA                                         | NA         |
| MANI_121697          | 10.57             | 57.48 | 12.98 | 2.50                                       | -2.05      |
| MANI_130428          | 0.00              | 0.82  | 0.00  | NA                                         | NA         |
| MANI_012054          | 2.89              | 4.95  | 7.29  | NA                                         | NA         |
| MANI_012122          | 34.25             | 11.69 | 14.72 | -1.46                                      | NA         |

The BGC boundaries were delimited by CASSIS.

**Table 56: Expression profiling of the MATERP6 cluster.**

| NCBI's gene locus ID | Expression (RPKM) |      |       | Differential expression (log2-fold change) |            |
|----------------------|-------------------|------|-------|--------------------------------------------|------------|
|                      | 48hC              | 48hl | 144hl | 48hCx48hl                                  | 48hlx144hl |

|                    |       |       |       |       |    |
|--------------------|-------|-------|-------|-------|----|
| <b>MANI_020045</b> | 4.98  | 9.12  | 10.37 | NA    | NA |
| <b>MANI_020046</b> | 9.79  | 8.35  | 11.31 | NA    | NA |
| <b>MANI_020049</b> | 1.81  | 3.65  | 8.89  | NA    | NA |
| <b>MANI_020053</b> | 58.05 | 21.51 | 35.15 | -1.30 | NA |

The BGC boundaries were delimited by CASSIS.

**Table 57: Expression profiling of the MaOTHER13 cluster.**

| NCBI's gene locus ID                       | Expression (RPKM) |       |       | Differential expression (log2-fold change) |            |
|--------------------------------------------|-------------------|-------|-------|--------------------------------------------|------------|
|                                            | 48hC              | 48hl  | 144hl | 48hCx48hl                                  | 48hlx144hl |
| <b>MANI_000542**</b>                       | 23.17             | 48.52 | 50.97 | 1.14                                       | NA         |
| <b>MANI_025166**</b>                       | 2.95              | 3.57  | 0.60  | NA                                         | NA         |
| <b>MANI_000548**</b>                       | 0.00              | 0.00  | 0.00  | NA                                         | NA         |
| <b>MANI_000544**</b>                       | 0.00              | 8.10  | 0.00  | NA                                         | NA         |
| <b>gene fragmented between two contigs</b> | X                 | X     | X     |                                            |            |
| <b>MANI_000554***</b>                      | 4.34              | 23.00 | 31.48 | 2.51                                       | NA         |
| <b>MANI_025168***</b>                      | 0.18              | 7.82  | 10.94 | 5.23                                       | NA         |
| <b>MANI_000583****</b>                     | 8.03              | 9.70  | 1.64  | NA                                         | -2.43      |
| <b>MANI_000620****</b>                     | 16.39             | 7.92  | 10.73 | NA                                         | NA         |
| <b>MANI_000601****</b>                     | 17.74             | 6.90  | 19.52 | -1.24                                      | 1.47       |
| <b>MANI_000573****</b>                     | 3.17              | 2.98  | 8.20  | NA                                         | 1.48       |
| <b>MANI_000623****</b>                     | 0.00              | 0.00  | 0.00  | NA                                         | NA         |
| <b>MANI_000569****</b>                     | 0.00              | 0.00  | 0.00  | NA                                         | NA         |

\*\*contig00046 \*\*\*contig00234 \*\*\*\*contig00235

The BGC boundaries were delimited by comparative genomic.

**Table 58: Expression profiling of the MaIND2 cluster.**

| NCBI's gene locus ID | Expression (RPKM) |         |        | Differential expression (log2-fold change) |            |
|----------------------|-------------------|---------|--------|--------------------------------------------|------------|
|                      | 48hC              | 48hl    | 144hl  | 48hCx48hl                                  | 48hlx144hl |
| MANI_004366          | 23.11             | 1503.88 | 224.45 | 6.15                                       | -2.69      |
| MANI_004339          | 8.07              | 6.99    | 2.03   | NA                                         | NA         |
| MANI_004371          | 4.99              | 18.77   | 23.19  | NA                                         | NA         |
| MANI_111866          | 27.97             | 55.51   | 49.94  | 1.11                                       | NA         |
| MANI_004296          | 603.43            | 29.95   | 15.52  | -4.23                                      | NA         |
| MANI_004325          | 6.92              | 4.71    | 2.18   | NA                                         | NA         |
| MANI_004330          | 62.93             | 283.97  | 119.47 | 2.30                                       | -1.23      |
| MANI_004315          | 149.01            | 74.86   | 43.86  | NA                                         | NA         |
| MANI_004356          | 17.98             | 86.01   | 27.68  | 2.38                                       | -1.66      |
| MANI_004327          | 1.15              | 26.91   | 25.45  | 4.51                                       | NA         |
| MANI_004359          | 0.00              | 0.00    | 0.00   | NA                                         | NA         |
| MANI_004342          | 0.00              | 2.15    | 0.00   | NA                                         | NA         |
| MANI_004337          | 2.88              | 2.32    | 1.88   | NA                                         | NA         |
| MANI_025992          | 3.17              | 0.85    | 0.00   | NA                                         | NA         |
| MANI_122213          | 6.38              | 7.19    | 2.09   | NA                                         | NA         |
| MANI_025981          | 4.80              | 3.48    | 2.36   | NA                                         | NA         |

The BGC boundaries were delimited by CASSIS.

Table 59: Expression profiling of the MaSID1 cluster.

| NCBI's gene locus ID | Expression (RPKM) |       |       | Differential expression (log2-fold change) |            |
|----------------------|-------------------|-------|-------|--------------------------------------------|------------|
|                      | 48hC              | 48hl  | 144hl | 48hCx48hl                                  | 48hlx144hl |
| MANI_004337          | 2.88              | 2.32  | 1.88  | NA                                         | NA         |
| MANI_025992          | 3.17              | 0.85  | 0.00  | NA                                         | NA         |
| MANI_122213          | 6.38              | 7.19  | 2.09  | NA                                         | NA         |
| MANI_025981          | 4.80              | 3.48  | 2.36  | NA                                         | NA         |
| MANI_025985          | 5.19              | 2.09  | 6.38  | NA                                         | NA         |
| MANI_122223          | 3.64              | 0.00  | 0.00  | NA                                         | NA         |
| MANI_004345          | 13.90             | 16.23 | 7.97  | NA                                         | NA         |

|                    |       |       |      |    |    |
|--------------------|-------|-------|------|----|----|
| <b>MANI_025995</b> | 34.27 | 23.91 | 9.36 | NA | NA |
| <b>MANI_004301</b> | 0.00  | 0.00  | 0.00 | NA | NA |
| <b>MANI_004302</b> | 0.00  | 0.00  | 0.00 | NA | NA |
| <b>MANI_004303</b> | 0.00  | 0.00  | 0.00 | NA | NA |
| <b>MANI_025984</b> | 0.00  | 0.00  | 0.00 | NA | NA |

The BGC boundaries were delimited by CASSIS.

**Table 60: Expression profiling of the MaTERP7 cluster.**

| NCBI's gene locus ID | Expression (RPKM) |       |       | Differential expression (log2-fold change) |            |
|----------------------|-------------------|-------|-------|--------------------------------------------|------------|
|                      | 48hC              | 48hl  | 144hl | 48hCx48hl                                  | 48hlx144hl |
| <b>MANI_020268</b>   | 7.86              | 0.00  | 1.07  | NA                                         | NA         |
| <b>MANI_020207</b>   | 0.59              | 0.48  | 0.00  | NA                                         | NA         |
| <b>MANI_020272</b>   | 0.00              | 0.00  | 0.00  | NA                                         | NA         |
| <b>MANI_020253</b>   | 0.00              | 0.00  | 0.00  | NA                                         | NA         |
| <b>MANI_020226</b>   | 3.26              | 1.97  | 1.33  | NA                                         | NA         |
| <b>MANI_130866</b>   | 1.39              | 0.00  | 0.00  | NA                                         | NA         |
| <b>MANI_020201</b>   | 3.17              | 22.04 | 15.93 | 2.86                                       | NA         |

The BGC boundaries were delimited by CASSIS.

**Table 61: Expression profiling of the MaPKS20 cluster (MrPKS1).**

| NCBI's gene locus ID | Expression (RPKM) |      |       | Differential expression (log2-fold change) |            |
|----------------------|-------------------|------|-------|--------------------------------------------|------------|
|                      | 48hC              | 48hl | 144hl | 48hCx48hl                                  | 48hlx144hl |
| <b>MANI_122426</b>   | 0.43              | 0.11 | 0.00  | NA                                         | NA         |
| <b>MANI_030118</b>   | 0.00              | 0.00 | 0.00  | NA                                         | NA         |
| <b>MANI_122440</b>   | 0.00              | 0.00 | 0.00  | NA                                         | NA         |
| <b>MANI_024459</b>   | 0.00              | 0.00 | 0.00  | NA                                         | NA         |

The BGC boundaries were delimited by CASSIS.

**Table 62: Expression profiling of the MaPKS20 cluster.**

| NCBI's gene locus ID | Expression (RPKM) |      |       | Differential expression (log2-fold change) |            |
|----------------------|-------------------|------|-------|--------------------------------------------|------------|
|                      | 48hC              | 48hl | 144hl | 48hCx48hl                                  | 48hlx144hl |
| MANI_009961          | 0.00              | 0.00 | 0.00  | NA                                         | NA         |
| MANI_009911          | 0.00              | 0.00 | 0.00  | NA                                         | NA         |
| MANI_009948          | 0.00              | 0.00 | 0.00  | NA                                         | NA         |
| MANI_009931          | 0.00              | 0.00 | 0.00  | NA                                         | NA         |
| MANI_122478          | 0.33              | 0.00 | 0.00  | NA                                         | NA         |

The BGC boundaries were delimited by CASSIS.

**Table 63: Expression profiling of the MaOTHER14 cluster.**

| NCBI's gene locus ID | Expression (RPKM) |      |       | Differential expression (log2-fold change) |            |
|----------------------|-------------------|------|-------|--------------------------------------------|------------|
|                      | 48hC              | 48hl | 144hl | 48hCx48hl                                  | 48hlx144hl |
| MANI_009929          | 8.46              | 2.62 | 0.00  | NA                                         | NA         |
| MANI_027167          | 0.00              | 0.00 | 0.00  | NA                                         | NA         |
| MANI_009917          | 0.00              | 0.00 | 0.00  | NA                                         | NA         |
| MANI_122490          | 0.60              | 0.00 | 0.00  | NA                                         | NA         |
| MANI_027170          | 0.62              | 0.00 | 1.01  | NA                                         | NA         |
| MANI_009926          | 1.56              | 0.00 | 0.00  | NA                                         | NA         |
| MANI_009964          | 0.00              | 0.00 | 0.00  | NA                                         | NA         |

The BGC boundaries were delimited by CASSIS.

**Table 64: Expression profiling of the MaTERP8 cluster.**

| NCBI's gene locus ID | Expression (RPKM) | Differential expression (log2-fold change) |
|----------------------|-------------------|--------------------------------------------|
|----------------------|-------------------|--------------------------------------------|



|                    |       |        |       | change)   |            |
|--------------------|-------|--------|-------|-----------|------------|
|                    | 48hC  | 48hl   | 144hl | 48hCx48hl | 48hlx144hl |
| <b>MANI_010996</b> | 0.00  | 142.69 | 29.99 | 8.44      | -2.19      |
| <b>MANI_027397</b> | 0.00  | 0.00   | 0.00  | NA        | NA         |
| <b>MANI_010966</b> | 12.38 | 17.56  | 15.94 | NA        | NA         |
| <b>MANI_010962</b> | 1.85  | 1.46   | 3.03  | NA        | NA         |
| <b>MANI_010993</b> | 0.00  | 0.00   | 0.00  | NA        | NA         |
| <b>MANI_010967</b> | 0.00  | 0.00   | 0.54  | NA        | NA         |
| <b>MANI_027387</b> | 10.14 | 11.92  | 11.13 | NA        | NA         |
| <b>MANI_027402</b> | 3.12  | 6.71   | 6.83  | NA        | NA         |
| <b>MANI_119837</b> | 1.88  | 0.00   | 1.54  | NA        | NA         |

The BGC boundaries were delimited by CASSIS.

**Table 65: Expression profiling of the MaPKS21 cluster.**

| NCBI's gene locus ID | Expression (RPKM) |       |       | Differential expression (log2-fold change) |            |
|----------------------|-------------------|-------|-------|--------------------------------------------|------------|
|                      | 48hC              | 48hl  | 144hl | 48hCx48hl                                  | 48hlx144hl |
| <b>MANI_110367</b>   | 0.00              | 0.33  | 0.00  | NA                                         | NA         |
| <b>MANI_006393</b>   | 0.00              | 0.00  | 0.00  | NA                                         | NA         |
| <b>MANI_006390</b>   | 0.00              | 2.05  | 0.00  | NA                                         | NA         |
| <b>MANI_006399</b>   | 0.70              | 0.00  | 0.00  | NA                                         | NA         |
| <b>MANI_006397</b>   | 0.00              | 0.42  | 0.00  | NA                                         | NA         |
| <b>MANI_006388</b>   | 1.13              | 0.61  | 0.00  | NA                                         | NA         |
| <b>MANI_006380</b>   | 4.53              | 0.37  | 0.93  | -3.34                                      | NA         |
| <b>MANI_025247</b>   | 13.04             | 7.88  | 8.01  | NA                                         | NA         |
| <b>MANI_110374</b>   | 16.10             | 4.82  | 1.23  | -1.61                                      | NA         |
| <b>MANI_025248</b>   | 0.94              | 0.75  | 1.53  | NA                                         | NA         |
| <b>MANI_000835</b>   | 10.20             | 58.41 | 32.51 | 2.63                                       | NA         |

The BGC boundaries were delimited by CASSIS.

**Table 66: Expression profiling of the MaPKS22 cluster.**

| NCBI's gene locus ID | Expression (RPKM) |       |       | Differential expression (log2-fold change) |            |
|----------------------|-------------------|-------|-------|--------------------------------------------|------------|
|                      | 48hC              | 48hl  | 144hl | 48hCx48hl                                  | 48hlx144hl |
| MANI_017305          | 11.98             | 4.70  | 2.27  | -1.21                                      | NA         |
| MANI_028697          | 32.25             | 19.25 | 11.85 | NA                                         | NA         |
| MANI_017308          | 44.68             | 42.33 | 54.92 | NA                                         | NA         |
| MANI_028694          | 9.95              | 7.16  | 1.17  | NA                                         | NA         |
| MANI_017329          | 5.44              | 0.00  | 0.64  | NA                                         | NA         |
| MANI_017326          | 14.64             | 33.41 | 15.00 | 1.34                                       | -1.17      |
| MANI_028690          | 100.76            | 59.02 | 47.20 | NA                                         | NA         |
| MANI_017297          | 76.21             | 53.97 | 58.30 | NA                                         | NA         |
| MANI_028699          | 16.10             | 7.98  | 15.22 | NA                                         | 1.01       |
| MANI_017319          | 28.36             | 15.67 | 19.14 | NA                                         | NA         |
| MANI_014258          | 0.00              | 0.00  | 0.00  | NA                                         | NA         |

The BGC boundaries were delimited by CASSIS.

**Table 67: Expression profiling of the MaTERP9 cluster.**

| NCBI's gene locus ID | Expression (RPKM) |       |       | Differential expression (log2-fold change) |            |
|----------------------|-------------------|-------|-------|--------------------------------------------|------------|
|                      | 48hC              | 48hl  | 144hl | 48hCx48hl                                  | 48hlx144hl |
| MANI_022954          | 5.42              | 0.55  | 1.67  | NA                                         | NA         |
| MANI_022919          | 19.28             | 6.79  | 2.57  | -1.38                                      | -1.39      |
| MANI_029935          | 19.16             | 23.51 | 9.72  | NA                                         | -1.20      |
| MANI_022959          | 11.49             | 12.03 | 5.18  | NA                                         | -1.15      |
| MANI_022941          | 2.43              | 18.77 | 6.76  | 3.04                                       | -1.44      |
| MANI_022963          | 4.64              | 9.60  | 6.51  | NA                                         | NA         |
| MANI_022973          | 0.00              | 4.29  | 1.45  | NA                                         | NA         |

The BGC boundaries were delimited by CASSIS.

**Table 68: Expression profiling of the MaIND3 cluster.**

| NCBI's gene locus ID | Expression (RPKM) |       |       | Differential expression (log <sub>2</sub> -fold change) |            |
|----------------------|-------------------|-------|-------|---------------------------------------------------------|------------|
|                      | 48hC              | 48hl  | 144hl | 48hCx48hl                                               | 48hlx144hl |
| <b>MANI_024998</b>   | 1.92              | 0.77  | 2.36  | NA                                                      | NA         |
| <b>MANI_030435</b>   | 0.00              | 0.00  | 0.00  | NA                                                      | NA         |
| <b>MANI_024979</b>   | 0.00              | 0.00  | 0.00  | NA                                                      | NA         |
| <b>MANI_024963</b>   | 2.58              | 0.26  | 2.90  | NA                                                      | NA         |
| <b>MANI_030430</b>   | 3.77              | 0.00  | 1.93  | NA                                                      | NA         |
| <b>MANI_024985</b>   | 1.68              | 0.90  | 3.22  | NA                                                      | NA         |
| <b>MANI_112059</b>   | 25.12             | 17.53 | 18.52 | NA                                                      | NA         |
| <b>MANI_024957</b>   | 2.32              | 22.89 | 6.89  | 3.42                                                    | -1.69      |

For all tables, forty-eight hours for control condition (hC) and both 48 and 144 hours for infection condition (hl) were used to estimate the relative changes in expression levels. NA: Not Available.
