# Supplementary material for: Secondary metabolite gene clusters in the entomopathogen fungus Metarhizium anisopliae: genome identification and patterns of expression in a cuticle infection model
Source: PubMed Central journal article supplement (PMC5088523; doi:10.1186/s12864-016-3067-6), 2016-10-25
Supplement: 12864_2016_3067_MOESM12_ESM.pdf [file 12864_2016_3067_MOESM12_ESM.pdf]

**Additional File 12:** Comparative genomic analysis and synteny for aurovertin, elymoclavine/ergovaline related compound, terpendole E/lolitrem related compound, and xenolozoyenone related compound BGCs.

**Elymoclavine/ergovaline related compound biosynthetic gene cluster**

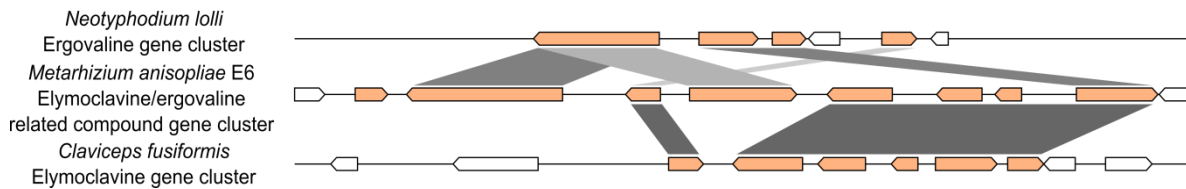

**Figure 1:** Comparative genomic analysis and synteny for elymoclavine/ergovaline related compound BGC (MaIND-NRPS1).

**Terpendole E/lolitrem related compound biosynthetic gene cluster**

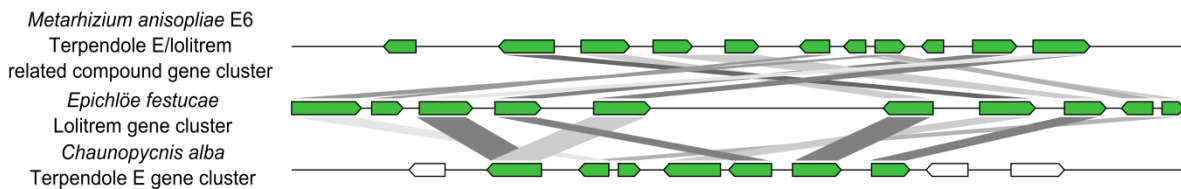

**Figure 2:** Comparative genomic analysis and synteny for terpendole E/lolitrem related compound BGC (MaIND-TERP1).

**Xenolozoyenone related compound biosynthetic gene cluster**

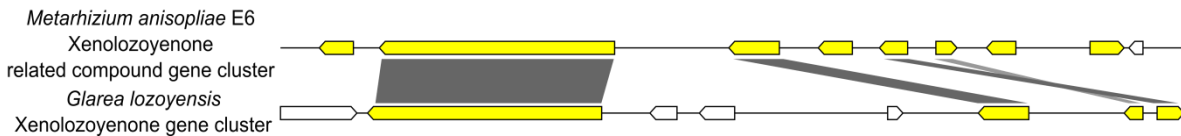

**Figure 3:** Comparative genomic analysis and synteny for xenolozoyenone related compound BGC (MaNRPS-PKS3).

**Table 1\*:** Identity between aurovertin BGC from *C. arbuscula* and the putative aurovertin BGC (MaPKS2) from *M. anisopliae*.

| <b><i>C. arbuscula</i> gene</b> | <b><i>M. anisopliae</i> gene</b> | <b>Identity</b> |
|---------------------------------|----------------------------------|-----------------|
| <b><i>aurA</i></b>              | MANI_004781                      | 77%             |
| <b><i>aurB</i></b>              | MANI_004840                      | 76 %            |
| <b><i>aurC</i></b>              | MANI_026083                      | 77 %            |
| <b><i>aurD</i></b>              | MANI_026090                      | 71 %            |
| <b><i>aurE</i></b>              | MANI_026098                      | 53 %            |
| <b><i>aurF</i></b>              | MANI_120612                      | 40%             |
| <b><i>aurG</i></b>              | x                                | x               |

\*No nucleotide sequence found for aurovertin BGC from *C. arbuscula*, not allowing synteny analysis.
