# Supplementary material for: Secondary metabolite gene clusters in the entomopathogen fungus Metarhizium anisopliae: genome identification and patterns of expression in a cuticle infection model
Source: PubMed Central journal article supplement (PMC5088523; doi:10.1186/s12864-016-3067-6), 2016-10-25
Supplement: 12864_2016_3067_MOESM13_ESM.pdf [file 12864_2016_3067_MOESM13_ESM.pdf]

**Additional File 13:** Additional phylogenetic trees.

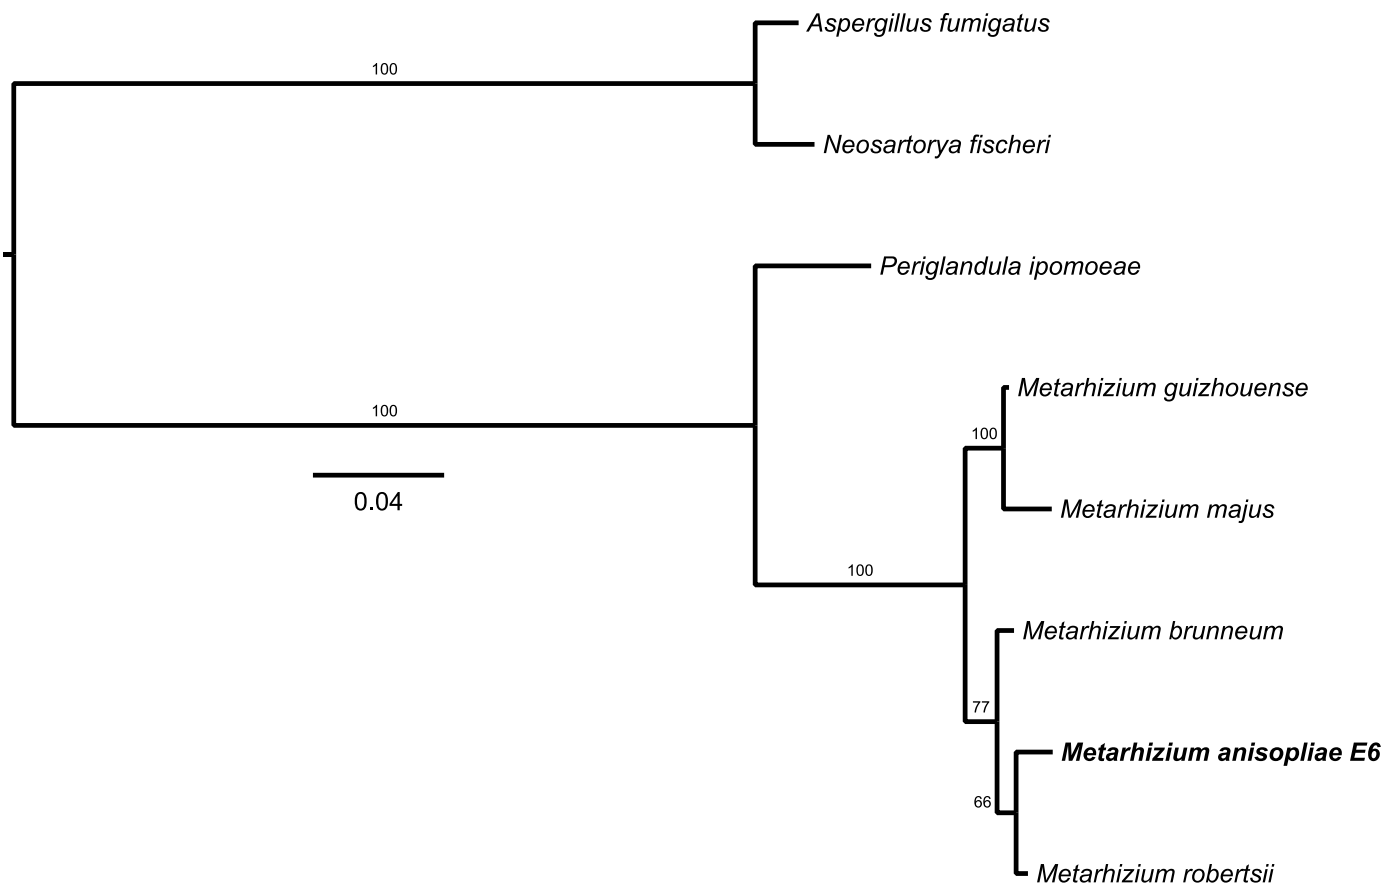

**Figure 1: Maximum-likelihood tree for MANI\_010495.** The gene MANI\_010495 assists in helvolic acid biosynthesis. Branches support values (bootstrap proportions) are associated with nodes.

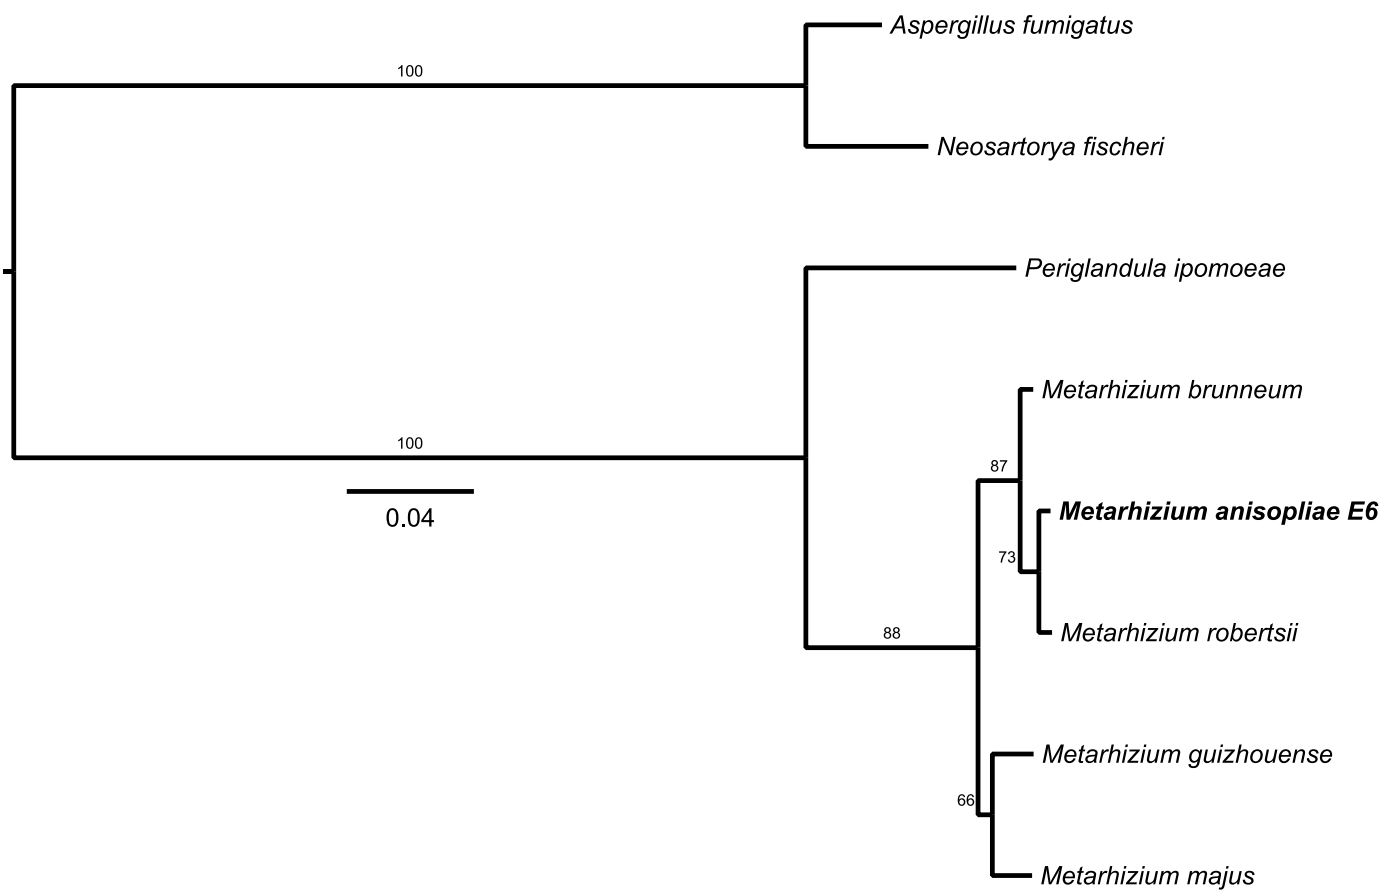

**Figure 1: Maximum-likelihood tree for MANI\_010512.** The gene MANI\_010512 assists in helvolic acid biosynthesis. Branches support values (bootstrap proportions) are associated with nodes.

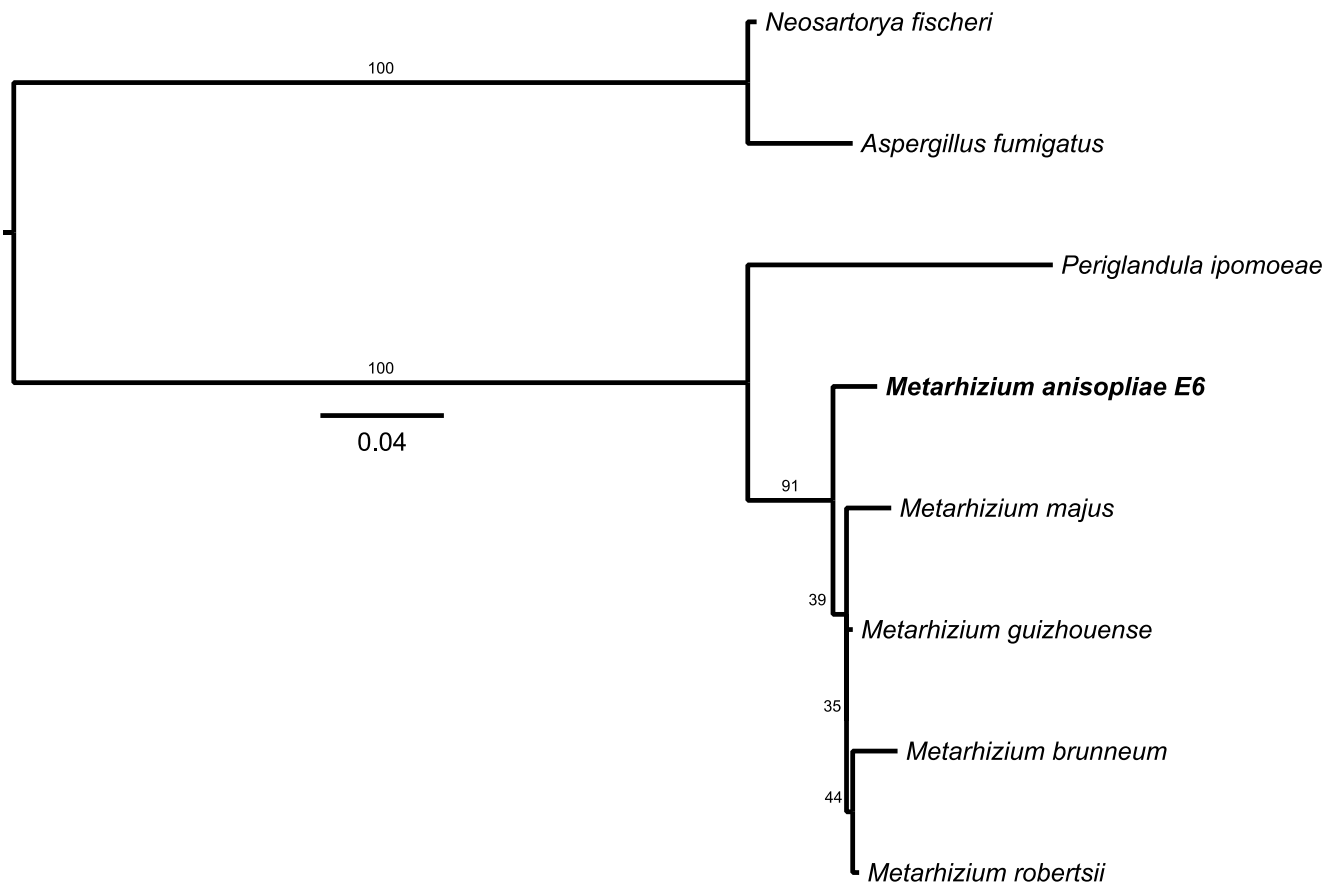

**Figure 2: Maximum-likelihood tree for MANI\_010527.** The gene MANI\_010527 assists in helvolic acid biosynthesis. Branches support values (bootstrap proportions) are associated with nodes.

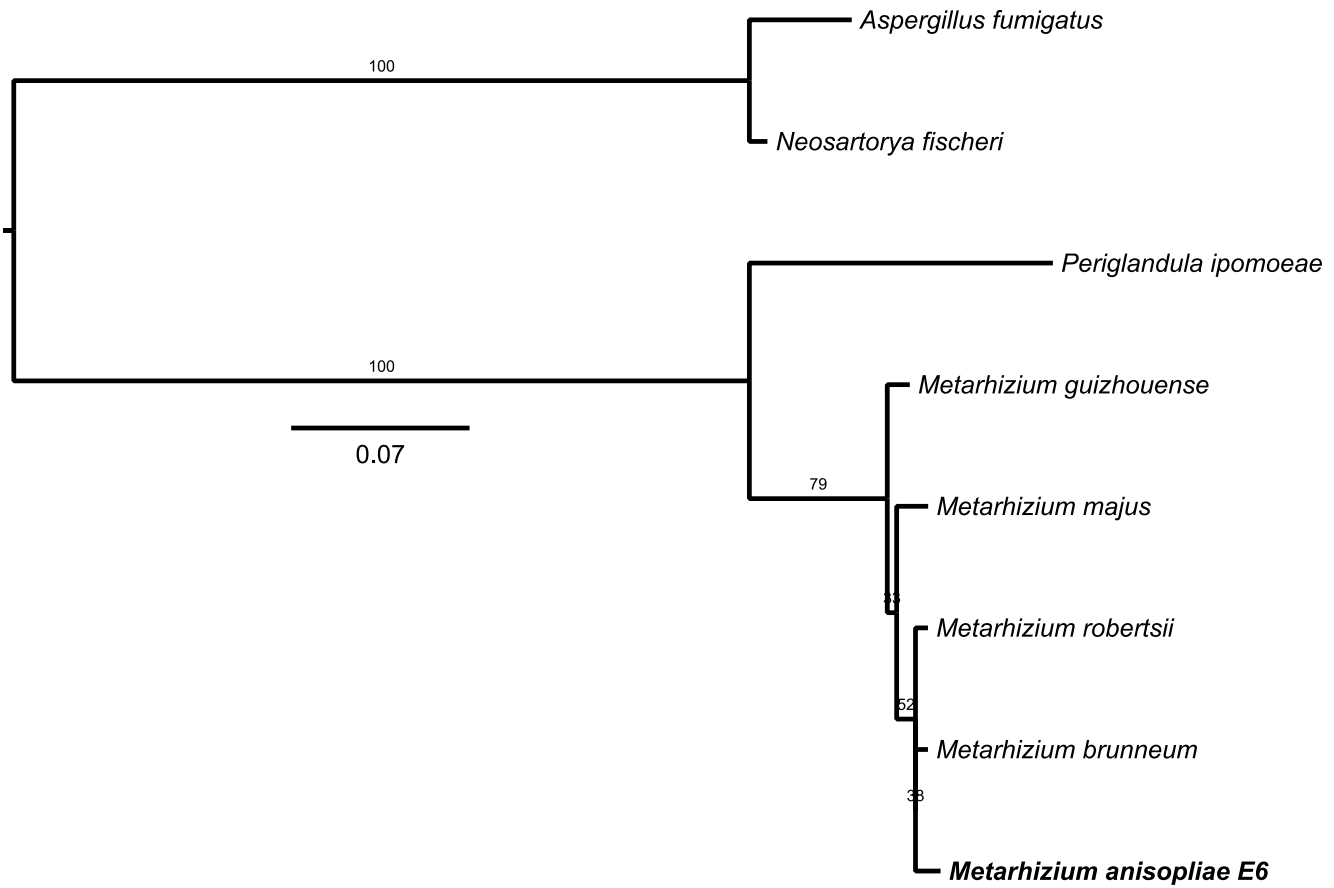

**Figure 3: Maximum-likelihood tree for MANI\_010530.** The gene MANI\_010530 assists in helvolic acid biosynthesis. Branches support values (bootstrap proportions) are associated with nodes.

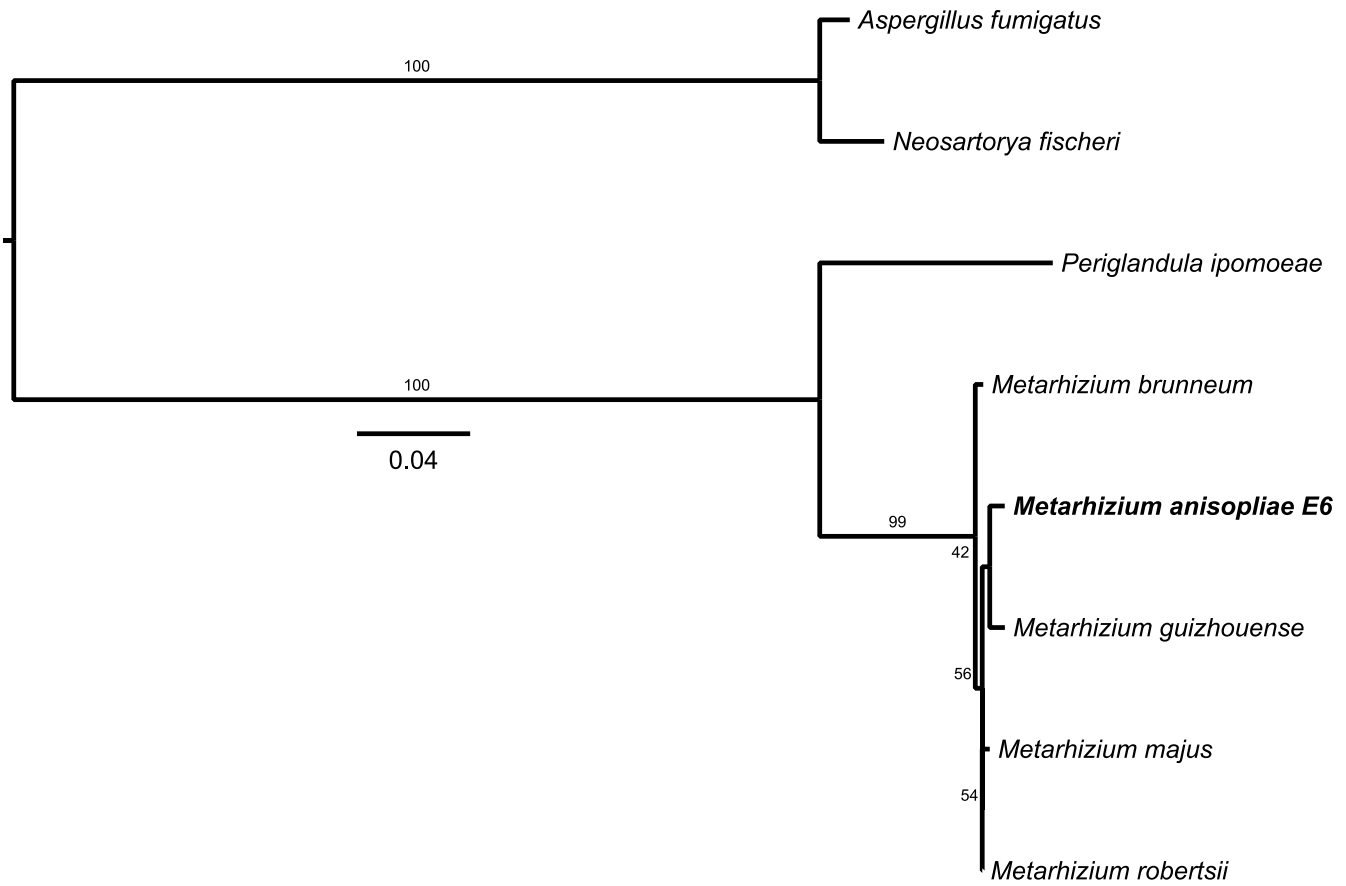

**Figure 4: Maximum-likelihood tree for MANI\_010531.** The gene MANI\_010531 assists in helvolic acid biosynthesis. Branches support values (bootstrap proportions) are associated with nodes.

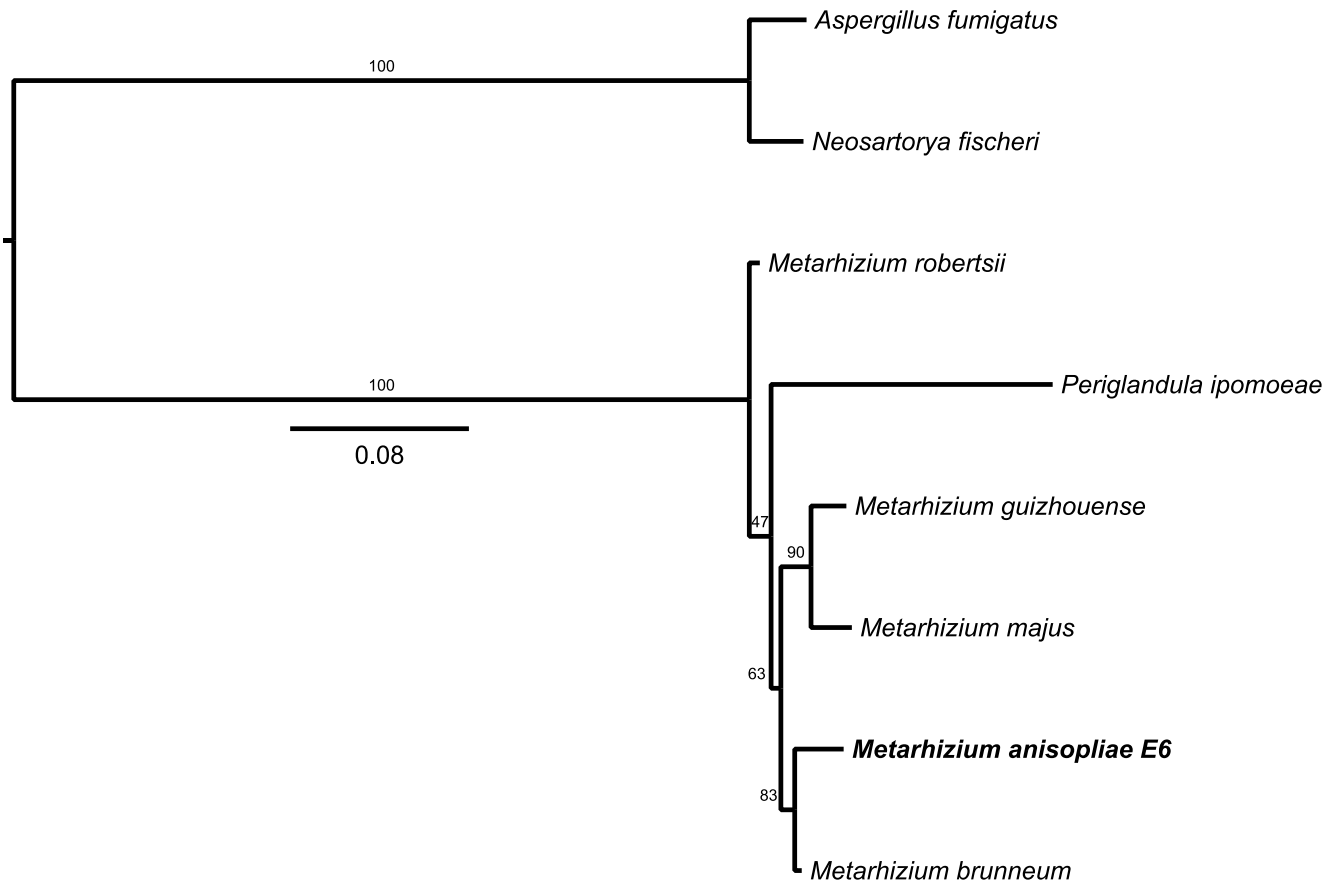

**Figure 5: Maximum-likelihood tree for MANI\_010532.** The gene MANI\_010532 assists in helvolic acid biosynthesis. Branches support values (bootstrap proportions) are associated with nodes.

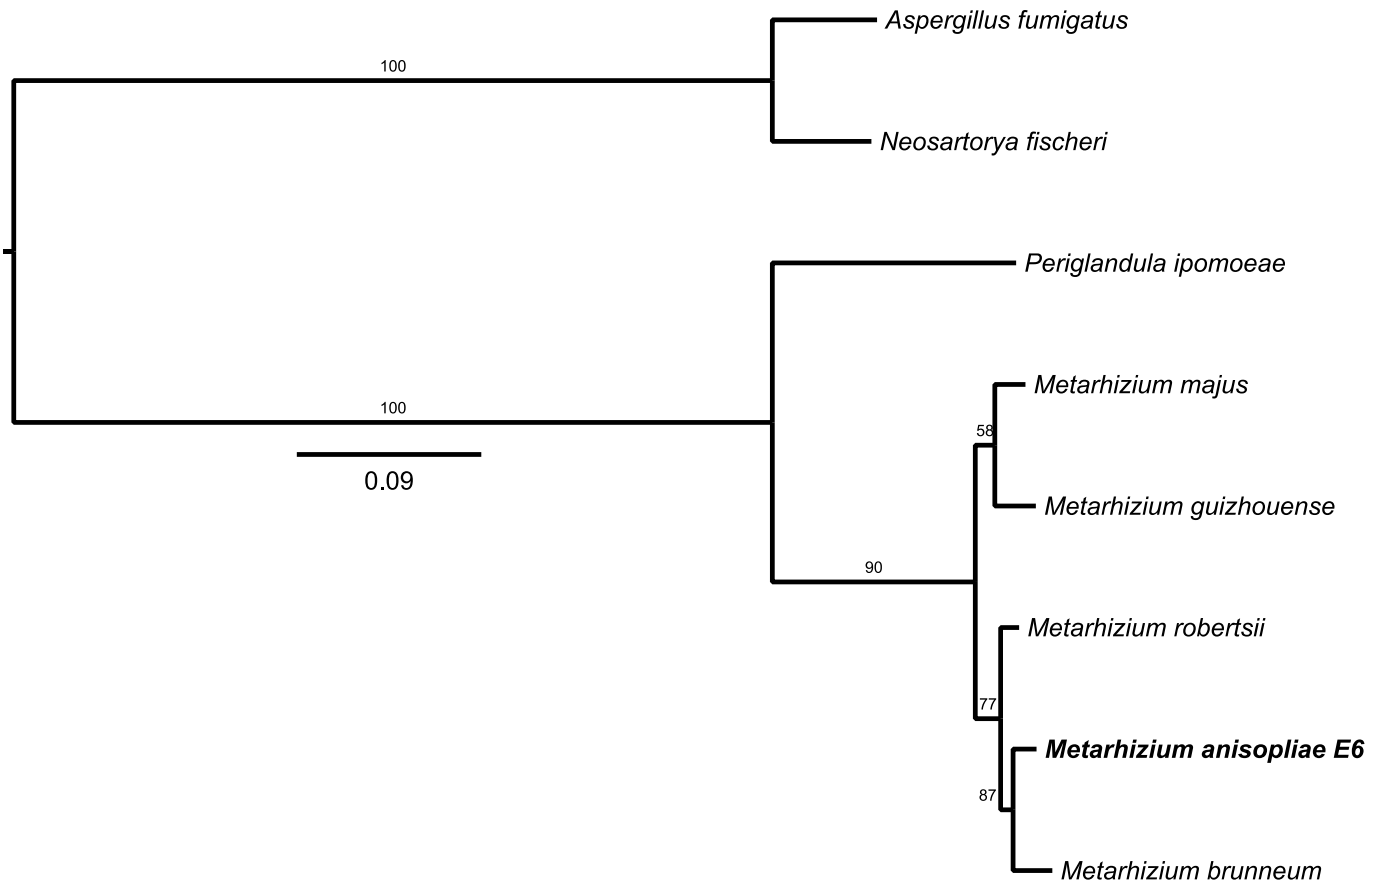

**Figure 6: Maximum-likelihood tree for MANI\_010536.** The gene MANI\_010536 assists in helvolic acid biosynthesis. Branches support values (bootstrap proportions) are associated with nodes.

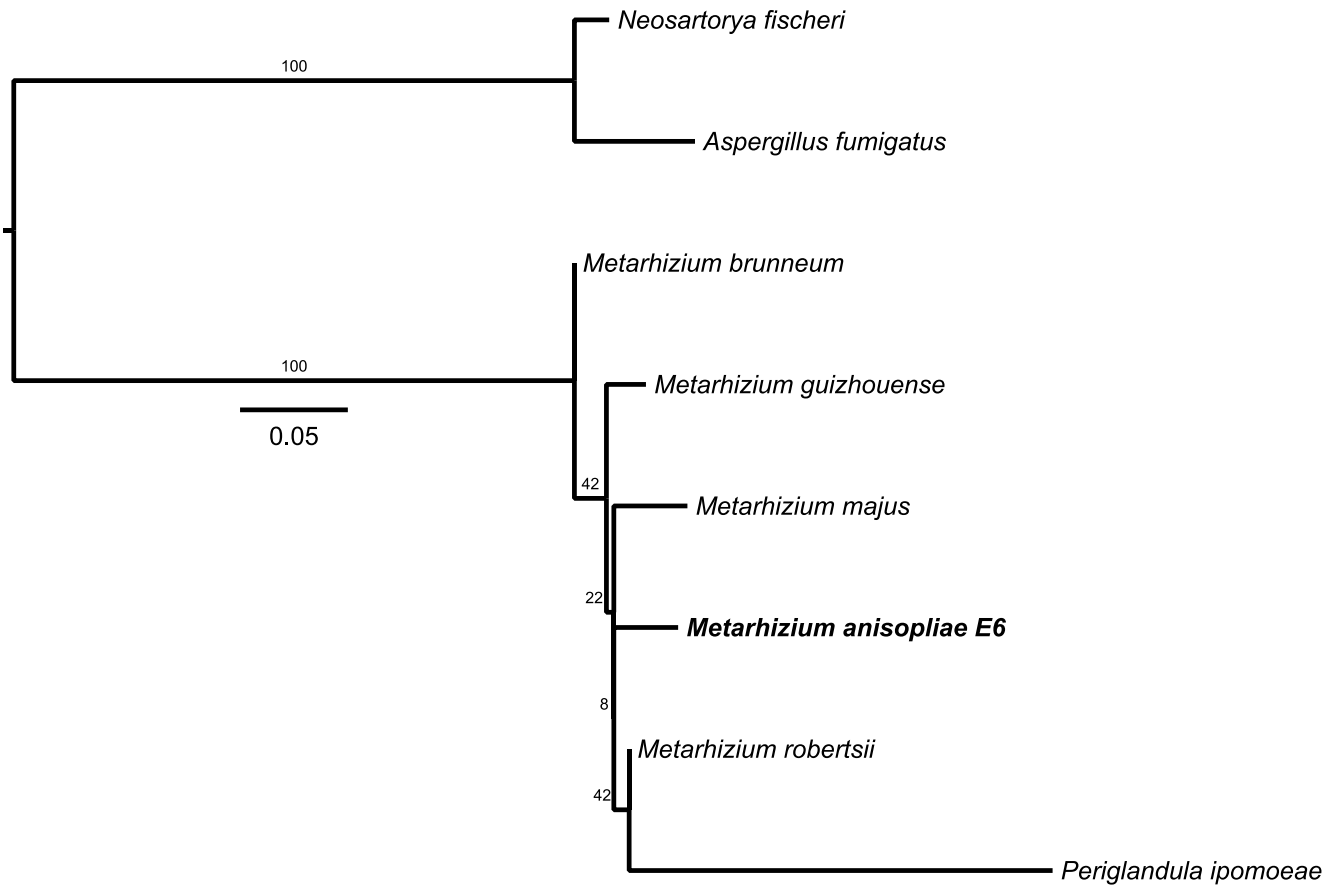

**Figure 7: Maximum-likelihood tree for MANI\_010537.** The gene MANI\_010537 assists in helvolic acid biosynthesis. Branches support values (bootstrap proportions) are associated with nodes.



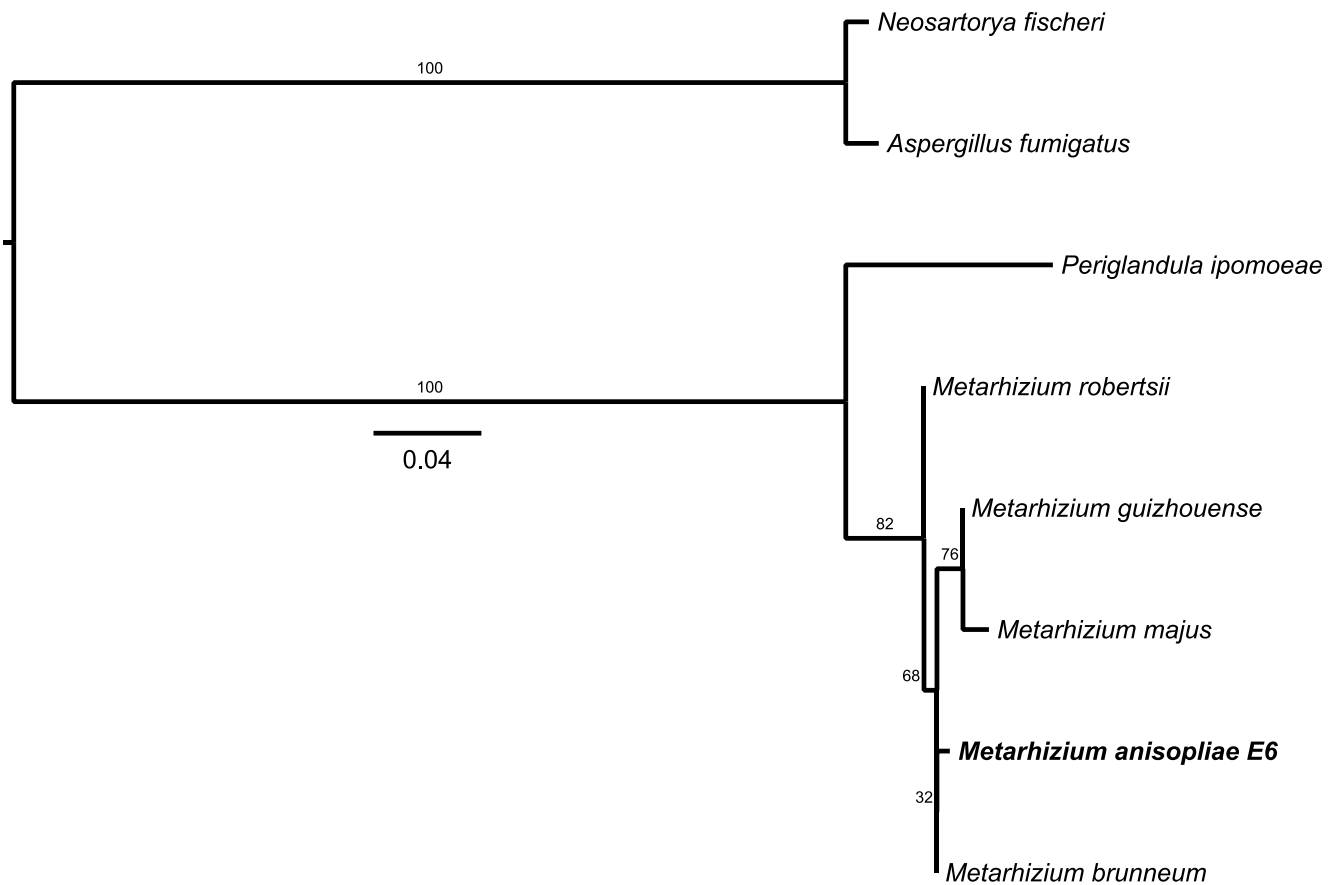

**Figure 8: Maximum-likelihood tree for MANI\_010594.** The gene MANI\_010594 assists in helvolic acid biosynthesis. Branches support values (bootstrap proportions) are associated with nodes.

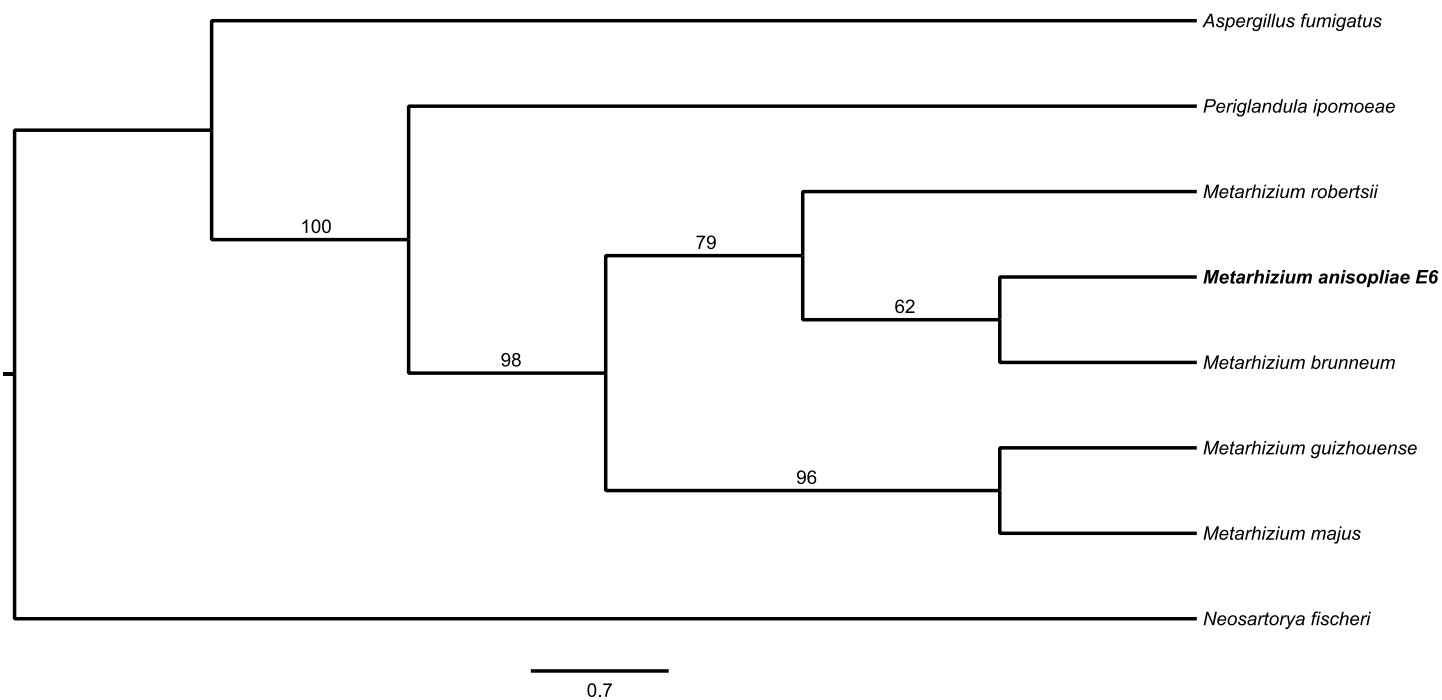

**Figure 9: Supertree.** MRP supertree constructed based on the inferred trees for helvolic acid cluster with CLANN 3.1.3. Branches support values (bootstrap proportions) are associated with nodes.

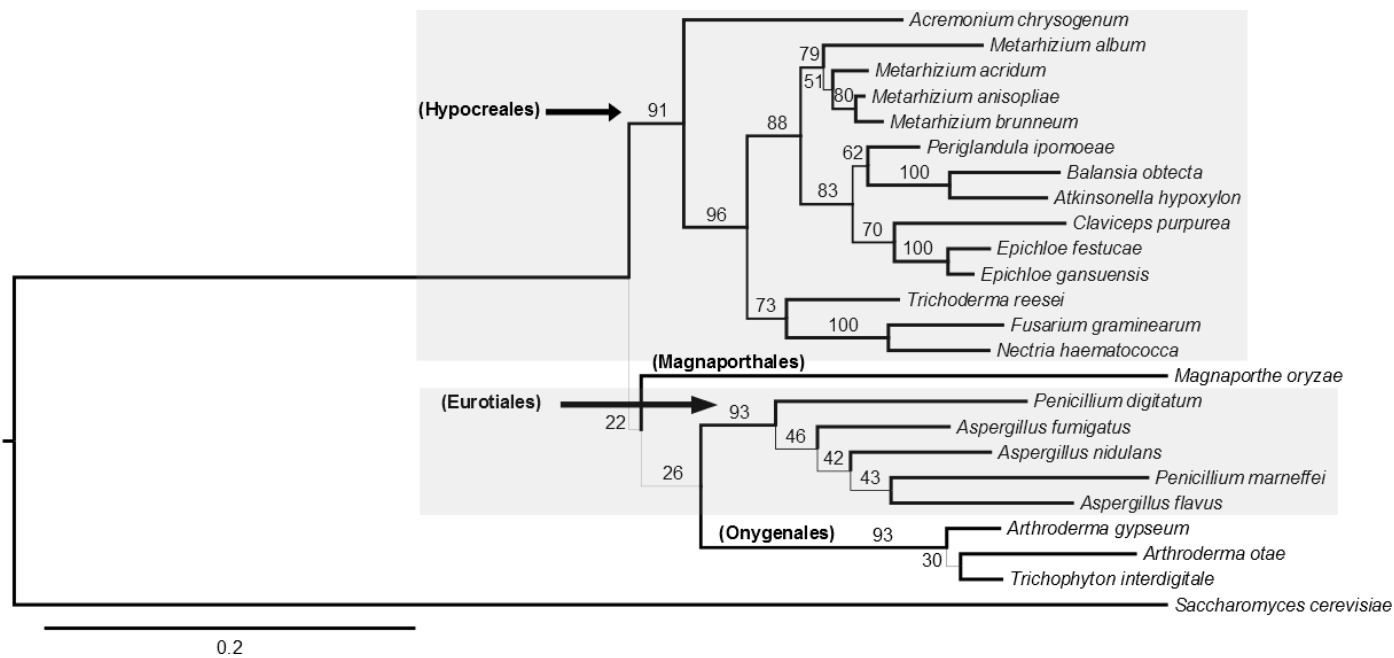

**Figure 10: Species tree.** Maximum-likelihood phylogeny for *tef1*, a barcode gene, showing the established species relationships. Branches support values (bootstrap proportions) are associated with nodes.
